# Supplementary material for: Synthesis, liquid crystalline behaviour and structure–property relationships of 1,3-bis(5-substituted-1,3,4-oxadiazol-2-yl)benzenes
Source: publisher site journal article supplement (doi:10.3762/bjoc.16.17), 2020-01-31
Supplement: Additional file 1 [file 1860-5397-16-17-S1.pdf]

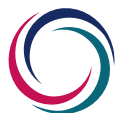

## Supporting Information

for

### **Synthesis, liquid crystalline behaviour and structure–property relationships of 1,3-bis(5-substituted-1,3,4-oxadiazol-2-yl)benzenes**

Afef Mabrouki, Malek Fouzai, Armand Soldera, Abdelkader Kriaa and Ahmed Hedhli

*Beilstein J. Org. Chem.* **2020**, *16*, 149–158. [doi:10.3762/bjoc.16.17](https://doi.org/10.3762/bjoc.16.17)

### **Experimental procedures, characterization data, NMR and FTIR spectra for the reported compounds and DSC thermograms for 2a and 4d**

## Contents

|                                                          |        |
|----------------------------------------------------------|--------|
| 1. Experimental part                                     | S2–S5  |
| 2. NMR and IR spectra                                    | S6–S21 |
| 3. DSC thermograms for compounds <b>2a</b> and <b>4d</b> | S22    |

## Experimental part

### *Materials and analytical measurements*

Commercially available reagents were all purchased from ACROS organics.

Perfluoroheptanoic acid and perfluorohexanoic acid were of 96%, perfluoroethyl iodide reagents were of 99%, benzoic acid and decanoic acid were of 99%, bromododecane was of 99%, and carbon disulfide was of 99.9%. All other chemicals were of 98% and solvents were of analytical grade. The  $^1\text{H}$ ,  $^{13}\text{C}$  and  $^{19}\text{F}$  NMR spectra were recorded on a Bruker AC 300 at 300, 75 and 282 MHz, respectively. TMS was used as standard reference for  $^1\text{H}$  NMR and  $^{13}\text{C}$  NMR spectra and  $\text{CFCl}_3$  for  $^{19}\text{F}$  NMR. The IR spectra were recorded on a Bruker IFS 66V/S. High-resolution mass spectral analysis (HRMS) was performed on AMD-604 spectrometer. Melting points were determined in capillaries and they are uncorrected. Differential scanning calorimetry (DSC) thermograms, are obtained in heating and cooling cycle. The sample is heated and cooled with a scan rate of  $5\text{ K}\cdot\text{min}^{-1}$  and held at its isotropic phase for two minutes to attain the thermal stability. Transition temperatures were checked and type of mesophase identified for the samples using a standard polarized-optical microscope POM (Olympus BX51) equipped with digital CCD camera (Sony). The LC textures are processed, analyzed and stored with aid of imaging software (Archimed). To set the temperature we put the cell in an oven. The temperature was controlled within  $\pm 1^\circ\text{C}/\text{min}$ . The X-ray patterns were collected at University of Sherbrooke, Qc. Canada, with a Bruker AXS Nanostar system equipped with a Microfocus Copper Anode at 45 kV / 0.65 mA, MONTAL OPTICS and a VANTEC 2000 2D detector. The detector to sample distance was calibrated with a Silver Behenate standard at 67.70 cm. The diffracted intensities were integrated from 0.15 to 5.2 deg. 2-theta. The collection exposure time was 300 seconds per sample.

Prediction of dipole moments and lowest conformation energies were accomplished by using the application *Instant J.Chem* 18.28.0; ChemAxon (<http://www.chemaxon.com>).

### *Synthesis of oxadiazole derivatives 2a–d: General procedure*

A mixture of benzene-1,3-dicarbohydrazide (0.97 g, 1 mmol) and 2 mmol of carboxylic acid in 10 ml of phosphorus oxychloride was refluxed for 12 h. The reaction mixture was slowly poured over crushed ice and kept overnight. The resulting solid was washed with aqueous  $\text{NaHCO}_3$  and then with water and recrystallized from dimethyl formamide.

1,3-Bis(5-perfluorohexyl-1,3,4-oxadiazol-2-yl)benzene (**2a**): Pink solid; yield = 65%; m.p.: 106°C; IR (cm<sup>-1</sup>):  $\nu_{\text{C=N}}$ : 1550,  $\nu_{\text{C=C}}$ : 1500,  $\nu_{\text{C-O}}$ : 1144,  $\nu_{\text{C-F}}$ : 1145; <sup>1</sup>H NMR (300 MHz, CDCl<sub>3</sub>)  $\delta$  (ppm): 7.80-8.81 (4H, C<sub>6</sub>H<sub>4</sub>); <sup>13</sup>C NMR (75 MHz, CDCl<sub>3</sub>)  $\delta$  (ppm): 165.72 (1s, 2C, N=C-C<sub>6</sub>H<sub>4</sub>-C=N), 155.40 (t, 2C, 2 N=C-CF<sub>2</sub>, <sup>2</sup>J<sub>CF</sub> = 23.00 Hz), 131.67, 130.72, 123.73, 119.00 (4s, 6C, C<sub>6</sub>H<sub>4</sub>); <sup>19</sup>F NMR (282 MHz, CDCl<sub>3</sub>)  $\delta$  (ppm): -80.80 (m, 6F, 2CF<sub>3</sub>), -112.56 (m, 4F, 2CF<sub>2 $\alpha$</sub> ), -121.53 (m, 4F, 2CF<sub>2 $\beta$</sub> ), -121.83 (m, 4F, 2CF<sub>2 $\gamma$</sub> ), -122.69 (m, 4F, 2CF<sub>2 $\delta$</sub> ), -126.08 (m, 4F, 2CF<sub>2 $\omega$</sub> ); HRMS (EI): calculated for C<sub>22</sub>H<sub>4</sub>F<sub>26</sub>N<sub>4</sub>O<sub>2</sub> 849.9919, found 849.9920.

1,3-Bis(5-perfluoroheptyl-1,3,4-oxadiazol-2-yl)benzene (**2b**): Pink solid; yield = 61%; m.p.: 120°C; IR (cm<sup>-1</sup>):  $\nu_{\text{C=N}}$ : 1500,  $\nu_{\text{C=C}}$ : 1400,  $\nu_{\text{C-O}}$ : 1145; <sup>1</sup>H NMR (300 MHz, CDCl<sub>3</sub>)  $\delta$  (ppm): 7.81-8.88 (4H, C<sub>6</sub>H<sub>4</sub>); <sup>13</sup>C NMR (75 MHz, CDCl<sub>3</sub>)  $\delta$  (ppm): 165.41 (1s, 2C, N=C-C<sub>6</sub>H<sub>4</sub>-C=N), 154.9 (t, 2C, 2N=C-CF<sub>2</sub>, <sup>2</sup>J<sub>CF</sub> = 23.30 Hz), 130.86, 129.56, 124.65, 120.24 (4s, 6C, C<sub>6</sub>H<sub>4</sub>); <sup>19</sup>F NMR (282 MHz, CDCl<sub>3</sub>)  $\delta$  (ppm): -80.74 (m, 6F, 2CF<sub>3</sub>), -112.54 (m, 4F, 2CF<sub>2 $\alpha$</sub> ), -121.37 (m, 4F, 2CF<sub>2 $\beta$</sub> ), -121.84 (m, 8F, 4CF<sub>2 $\gamma$</sub> ), -122.64 (m, 4F, 2CF<sub>2 $\delta$</sub> ), -126.09 (m, 4F, 2CF<sub>2 $\omega$</sub> ); HRMS (EI): calculated for C<sub>24</sub>H<sub>4</sub>F<sub>30</sub>N<sub>4</sub>O<sub>2</sub> 949.9855, found 949.9855.

1,3-Bis(5-nonyl-1,3,4-oxadiazol-2-yl)benzene (**2c**): White solid; yield = 75%; m.p.: 83°C; IR (cm<sup>-1</sup>)  $\nu_{\text{(C-H)}}$ : 2918,  $\nu_{\text{C=N}}$ : 1547,  $\nu_{\text{C=C}}$ : 1479,  $\nu_{\text{C-O}}$ : 1250; <sup>1</sup>H NMR (300 MHz, CDCl<sub>3</sub>)  $\delta$  (ppm) 7.71-8.55 (4H, C<sub>6</sub>H<sub>4</sub>), 3.33 (t, 4H, 2N=C-CH<sub>2</sub>CH<sub>2</sub>, <sup>3</sup>J<sub>H-H</sub> = 6.43 Hz), 1.22-1.88 (m, 28H, 2N=C-CH<sub>2</sub>-(CH<sub>2</sub>)<sub>7</sub>-CH<sub>3</sub>), 0.80 (t, 6H, CH<sub>3</sub>CH<sub>2</sub>, <sup>3</sup>J<sub>H-H</sub> = 6.81 Hz); <sup>13</sup>C NMR (75 MHz, CDCl<sub>3</sub>)  $\delta$  (ppm): 165.53 (1s, 2C, N=C-C<sub>6</sub>H<sub>4</sub>-C=N), 163.75 (1s, 2C, 2N=C-R), 129.87, 129.40, 125.11, 124.95 (4s, 6C, C<sub>6</sub>H<sub>4</sub>), 31.82, 29.68, 29.35, 29.21, 29.11, 29.04, 29.59, 25.49 (8s, 16C, 2N=C-(CH<sub>2</sub>)<sub>8</sub>-CH<sub>3</sub>), 14.09 (1s, 2C, 2CH<sub>3</sub>); HRMS (EI): calculated for C<sub>28</sub>H<sub>42</sub>N<sub>4</sub>O<sub>2</sub> 466.3307, found 466.3311.

1,3-Bis(5-phenyl-1,3,4-oxadiazol-2-yl)benzene (**2d**): White solid; yield = 72%; m.p.: 74°C; IR (cm<sup>-1</sup>)  $\nu_{\text{C=N}}$ : 1547,  $\nu_{\text{C=C}}$ : 1479,  $\nu_{\text{C-O}}$ : 1250; <sup>1</sup>H NMR (300 MHz, CDCl<sub>3</sub>)  $\delta$  (ppm): 7.31-8.91 (14H, C<sub>6</sub>H<sub>4</sub>, H<sub>2</sub>Ph); <sup>13</sup>C NMR (75 MHz, CDCl<sub>3</sub>)  $\delta$  (ppm): 165.65 (1s, 2C, N=C-C<sub>6</sub>H<sub>4</sub>-C=N), 164.22 (1s, 2C, 2C=N-Ph), 132.34, 131.22, 129.41, 128.75, 127.63, 127.34, 126.4, 124.83 (8s, 18C, C<sub>6</sub>H<sub>4</sub>, C<sub>2</sub>Ph); HRMS (EI): calculated for C<sub>22</sub>H<sub>14</sub>N<sub>4</sub>O<sub>2</sub> 366.1116, found 366.1114.

### **Preparation of bis-1,3-(5-thio-1,3,4-oxadiazol-2-yl)benzene 3**

To a solution of potassium hydroxide (0.56 g, 10 mmol) in absolute ethanol (50 ml), isophthalic dihydrazide **1** (0.97 g, 5 mmol) was added with stirring. Carbon disulfide (0.83 g, 11 mmol) was added to the reaction mixture, which led to a pale yellow precipitate formation. The

reaction mixture was heated under reflux for overnight, during which time the mixture became clear. The solvent was removed under reduced pressure, and the residue was dissolved in cold water. Then it was acidified with glacial acetic acid and filtered off to give the crude product. The latter was recrystallized from DMF. Yellow solid, yield: 54%, m.p.: 218°C. IR (cm<sup>-1</sup>):  $\nu_{\text{N-H}} = 3387.1$ ,  $\nu_{\text{C-H}} = 3073$ ,  $\nu_{\text{C=N}} = 1637.5$ ,  $\nu_{\text{C=C}} = 1521.3$ ,  $\nu_{\text{C=S}} = 1263.6$ ,  $\nu_{\text{C-O-C}} = 1160$ . <sup>1</sup>H NMR (300 MHz, DMSO)  $\delta$  (ppm): 7.81-8.33 (4H, C<sub>6</sub>H<sub>4</sub>), 3.55 (b, 1H, NNH), <sup>13</sup>C NMR (75 MHz, DMSO)  $\delta$  (ppm): 177.61 (1s, 2C, C=S), 159.38, 162.26 (2s, 2C, N=C-C<sub>6</sub>H<sub>4</sub>-C=N), 123.05, 123.68, 129.15, 130.77 (4s, 6C, C<sub>6</sub>H<sub>4</sub>).

#### *Synthesis of oxadiazole derivatives 4a–d: General procedure*

To a solution of potassium hydroxide (0.28 g, 10 mmol) in absolute ethanol (50 ml), intermediate **3** (1.39 g, 5 mmol) was added under stirring. A solution of alkyl/fluoro alkyl ethyl halide (10 mmol) in ethanol (20 ml) was added. The reaction mixture was heated at 70 °C under reflux for overnight. After cooling, water (100 ml) was added and the resulting solid was recrystallized from ethanol/hexane.

1,3-Bis[(5-perfluorohexylethyl)sulfanyl]-1,3,4-oxadiazol-2-yl]benzene (**4a**): Pale yellow solid yield = 74%; m.p.: 128°C; IR (cm<sup>-1</sup>):  $\nu_{\text{C-H}}: 2920$ ,  $\nu_{\text{C=N}}: 1550$ ,  $\nu_{\text{C=C}}: 1471$ ,  $\nu_{\text{C-O}}: 1203$ ; <sup>1</sup>H NMR (300 MHz, CDCl<sub>3</sub>)  $\delta$  (ppm): 7.55-8.71 (4H, C<sub>6</sub>H<sub>4</sub>), 3.54 (t, 4H, 2SCH<sub>2</sub>-CH<sub>2</sub>, <sup>3</sup>J<sub>H-H</sub> = 6.77 Hz), 2.71 (m, 4H, 2SCH<sub>2</sub>CH<sub>2</sub>C<sub>6</sub>F<sub>13</sub>); <sup>13</sup>C NMR (75 MHz, CDCl<sub>3</sub>)  $\delta$  (ppm): 165.54 (1s, 2C, N=C-C<sub>6</sub>H<sub>4</sub>-C=N), 162.42 (1s, 2C, 2N=C-SCH<sub>2</sub>CH<sub>2</sub>R<sub>F</sub>), 132.24, 131.33, 123.81, 121.00 (4s, 6C, C<sub>6</sub>H<sub>4</sub>), 35.44 (t, 2C, SCH<sub>2</sub>CH<sub>2</sub>C<sub>6</sub>F<sub>13</sub>, <sup>2</sup>J<sub>CF</sub> = 21.96 Hz), 24.73 (1s, 2C, SCH<sub>2</sub>CH<sub>2</sub>CF<sub>2</sub>); <sup>19</sup>F NMR (282 MHz, CDCl<sub>3</sub>)  $\delta$  (ppm): -80.77 (m, 6F, 2CF<sub>3</sub>), -114.32 (m, 4F, 2CF<sub>2a</sub>), -121.87 (m, 4F, 2CF<sub>2b</sub>), -122.87 (m, 4F, 2CF<sub>2c</sub>), -123.33 (m, 4F, 2CF<sub>2d</sub>), -126.14 (m, 4F, 2CF<sub>2e</sub>); HRMS (EI): calculated for C<sub>26</sub>H<sub>12</sub>F<sub>26</sub>N<sub>4</sub>O<sub>2</sub>S<sub>2</sub> 969.9986, found 969.9987.

1,3-Bis[(5-perfluorooctylethyl)sulfanyl]-1,3,4-oxadiazol-2-yl]benzene (**4b**): Pale yellow solid; yield = 66%; m.p.: 138°C; IR (cm<sup>-1</sup>):  $\nu_{\text{C-H}}: 2918$ ,  $\nu_{\text{C-O}}: 1203$ ,  $\nu_{\text{C=N}}: 1552$ ,  $\nu_{\text{C=C}}: 1471$ ; <sup>1</sup>H NMR (300 MHz, CDCl<sub>3</sub>)  $\delta$  (ppm): 7.55-8.61 (4H, C<sub>6</sub>H<sub>4</sub>), 3.58 (t, 4H, 2SCH<sub>2</sub>-CH<sub>2</sub>, <sup>3</sup>J<sub>H-H</sub> = 6.72 Hz), 2.84 (m, 4H, 2SCH<sub>2</sub>CH<sub>2</sub>C<sub>8</sub>F<sub>17</sub>); <sup>13</sup>C NMR (75 MHz, CDCl<sub>3</sub>)  $\delta$  (ppm): 163.74 (1s, 2C, N=C-C<sub>6</sub>H<sub>4</sub>-C=N), 161.86 (1s, 2C, 2N=C-SCH<sub>2</sub>CH<sub>2</sub>R<sub>F</sub>), 131.7, 127.33, 124.55, 122.24 (4s, 6C, C<sub>6</sub>H<sub>4</sub>), 35.7 (t, 2C, SCH<sub>2</sub>CH<sub>2</sub>CF<sub>2</sub>, <sup>2</sup>J<sub>CF</sub> = 21.95 Hz), 24.71 (1s, 2C, SCH<sub>2</sub>CH<sub>2</sub>CF<sub>2</sub>); <sup>19</sup>F NMR (282 MHz, CDCl<sub>3</sub>)  $\delta$  (ppm): -80.72 (m, 6F, 2CF<sub>3</sub>), -114.24 (m, 4F, 2CF<sub>2a</sub>), -121.62 (m, 4F, 2CF<sub>2b</sub>), -121.87 (m, 8F, 4CF<sub>2c</sub>), -122.67 (m, 4F, 2CF<sub>2d</sub>), -123.25 (m, 4F, 2CF<sub>2e</sub>), -126.10 (m, 4F, 2CF<sub>2f</sub>); HRMS (EI): calculated for C<sub>30</sub>H<sub>12</sub>F<sub>34</sub>N<sub>4</sub>O<sub>2</sub>S<sub>2</sub> 1169.9858, found 1169.9862.

1,3-Bis[(5-butylsulfanyl)-1,3,4-oxadiazol-2-yl]benzene (**4c**): Pale yellow solid; yield = 70%; m.p.: 69°C; IR (cm<sup>-1</sup>)  $\nu_{\text{(C-H)}}$ : 2954,  $\nu_{\text{C=N}}$ : 1553,  $\nu_{\text{C=C}}$ : 1465,  $\nu_{\text{C-O}}$ : 1181; <sup>1</sup>H NMR (300 MHz, CDCl<sub>3</sub>)  $\delta$  (ppm): 7.44-8.77 (4H, C<sub>6</sub>H<sub>4</sub>), 3.33 (t, 4H, 2SCH<sub>2</sub>CH<sub>2</sub>, <sup>3</sup>J<sub>HH</sub> = 6.83 Hz), 1.8 (m, 4H, 2SCH<sub>2</sub>CH<sub>2</sub>-CH<sub>2</sub>), 1.5 (m, 4H, 2CH<sub>2</sub>CH<sub>2</sub>CH<sub>3</sub>), 1.10 (t, 6H, 2CH<sub>3</sub>, <sup>2</sup>J<sub>HH</sub> = 7.32 Hz); <sup>13</sup>C NMR (75 MHz, CDCl<sub>3</sub>)  $\delta$  (ppm): 165.31, (1s, 2C, N=C-C<sub>6</sub>H<sub>4</sub>-C=N), 164.56 (1s, 2C, 2N=C-R), 129.93, 129.13, 124.74, 124.40 (4s, 6C, C<sub>6</sub>H<sub>4</sub>), 32.36, 31.21, 21.74, (3s, 6C, 2(CH<sub>2</sub>)<sub>3</sub>), 13.50 (1s, 2C, 2CH<sub>3</sub>); HRMS (EI): calculated for C<sub>18</sub>H<sub>22</sub>N<sub>4</sub>O<sub>2</sub>S<sub>2</sub> 390.1184, found 390.1183.

1,3-Bis[(5-dodecylsulfanyl)-1,3,4-oxadiazol-2-yl]benzene (**4d**): Pale yellow solid; yield = 72%; m.p.: 88°C; IR (cm<sup>-1</sup>)  $\nu_{\text{(C-H)}}$ : 2918,  $\nu_{\text{C-O}}$ : 1176,  $\nu_{\text{C=N}}$ : 1550,  $\nu_{\text{C=C}}$ : 1471; <sup>1</sup>H NMR (300 MHz, CDCl<sub>3</sub>)  $\delta$  (ppm): 7.66-8.53 (4H, C<sub>6</sub>H<sub>4</sub>), 3.3 (t, 4H, 2SCH<sub>2</sub>CH<sub>2</sub>, <sup>3</sup>J<sub>HH</sub> = 6.70 Hz), 1.20-1.85 (m, 40H, 2SCH<sub>2</sub>-(CH<sub>2</sub>)<sub>10</sub>-CH<sub>3</sub>), 0.8 (t, 6H, 2CH<sub>3</sub>, <sup>3</sup>J<sub>HH</sub> = 7.41 Hz); <sup>13</sup>C NMR (75 MHz, CDCl<sub>3</sub>)  $\delta$  (ppm): 165.70, (1s, 2C, N=C-C<sub>6</sub>H<sub>4</sub>-C=N), 164.61 (1s, 2C, 2N=C-R), 130.09, 129.98, 124.86, 124.72 (4s, 6C, C<sub>6</sub>H<sub>4</sub>), 34.03, 32.84, 32.72, 31.90, 29.69, 29.61, 29.54, 29.44, 29.40, 29.33, 29.32, (11s, 22C, 2(CH<sub>2</sub>)<sub>11</sub>), 14.11 (1s, 2C, 2CH<sub>3</sub>); HRMS (EI): calculated for C<sub>34</sub>H<sub>54</sub>N<sub>4</sub>O<sub>2</sub>S<sub>2</sub> 614.3688, found 614.3679.

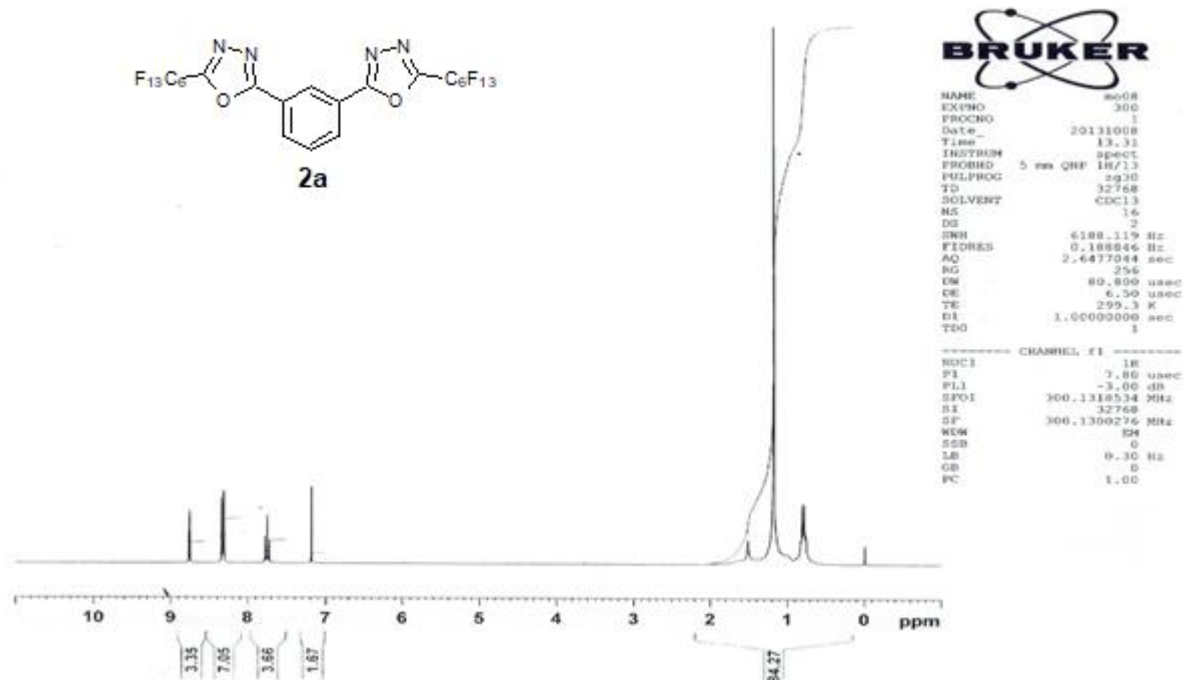

<sup>1</sup>H NMR spectrum of compound **2a**.

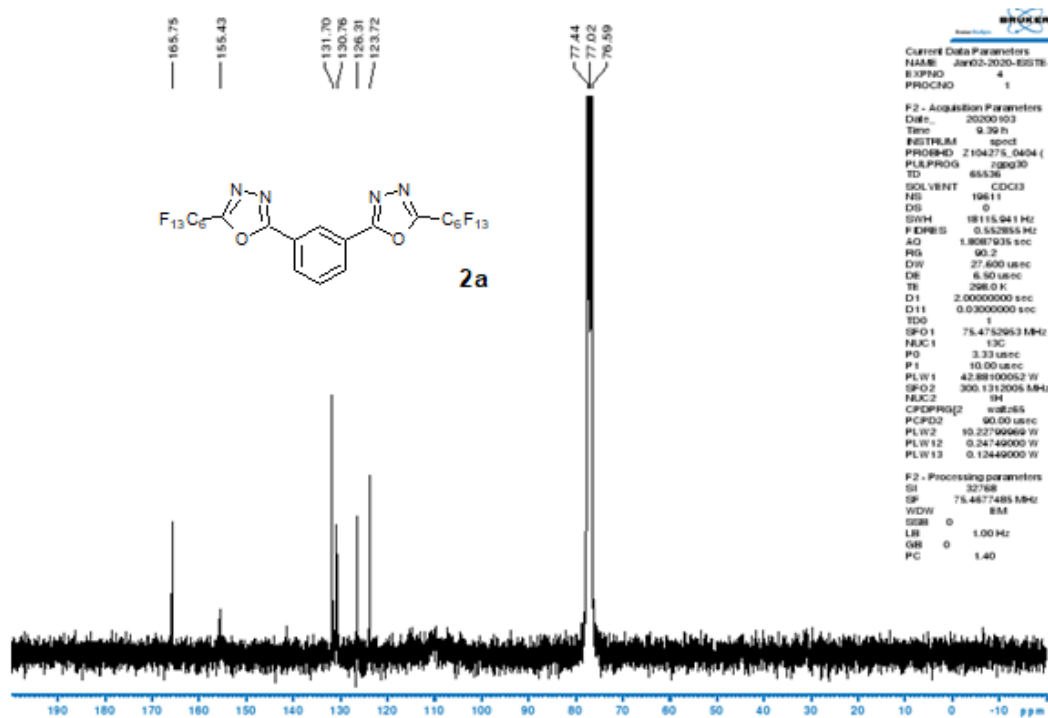

<sup>13</sup>C NMR spectrum of compound **2a**.

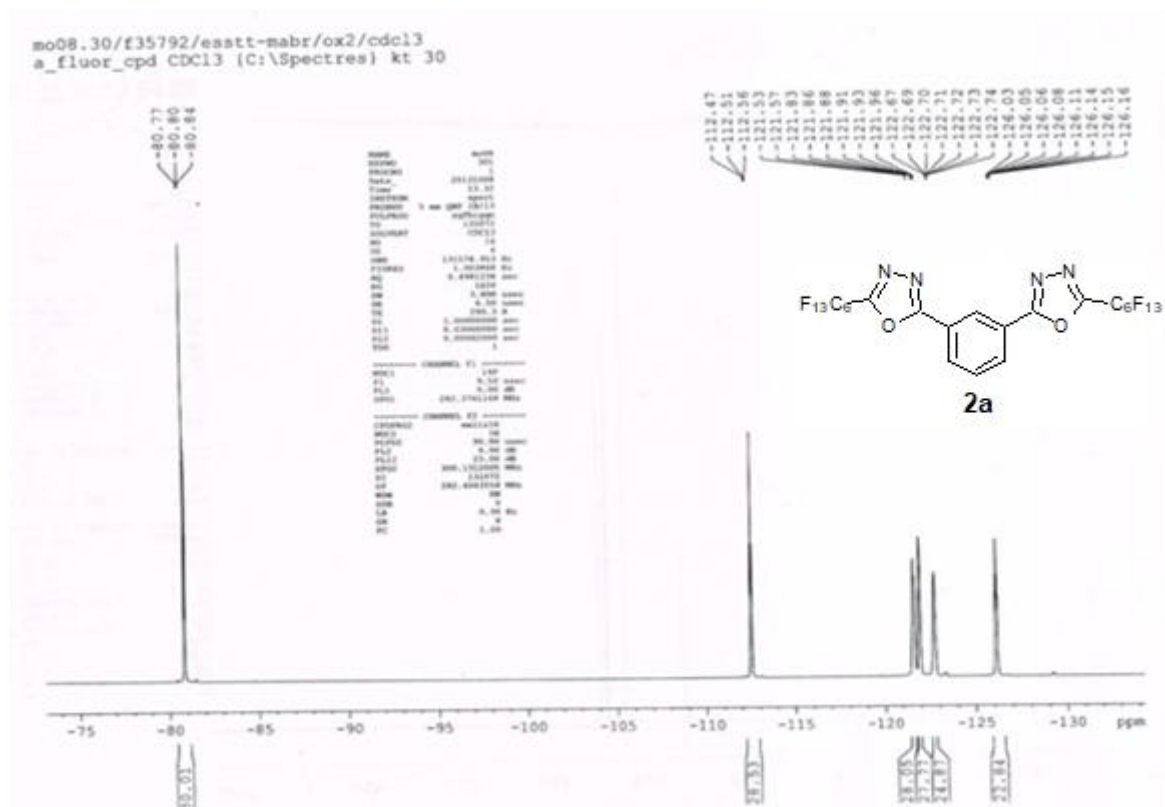

$^{19}\text{F}$  NMR spectrum of compound **2a**.

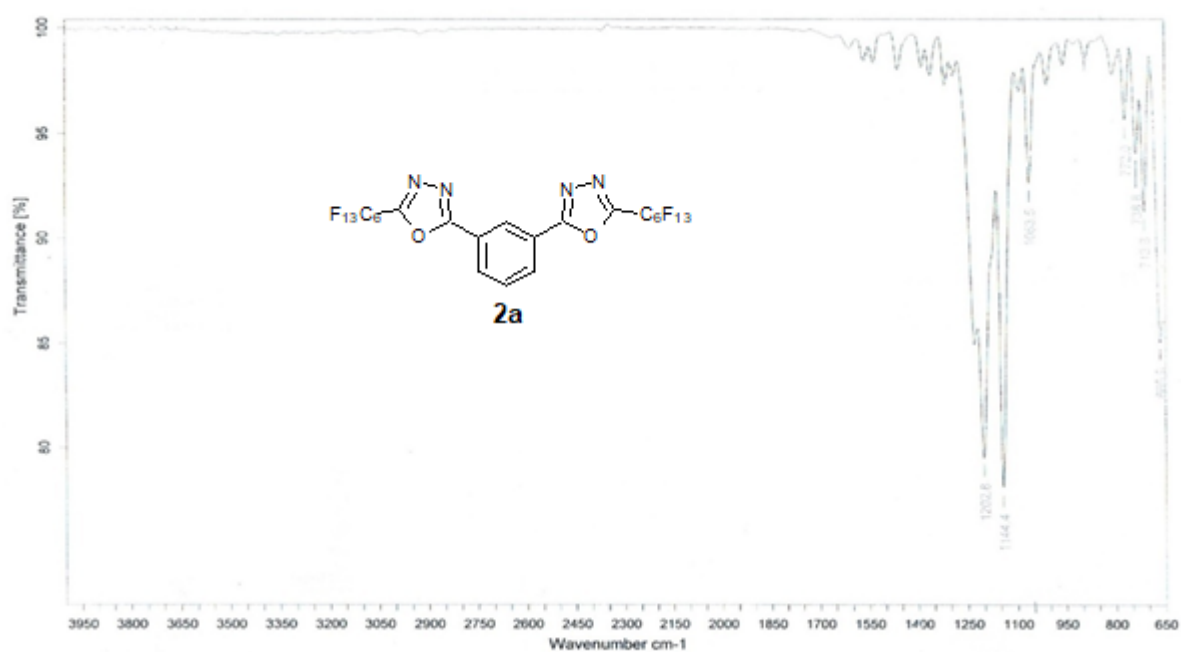

IR spectrum of compound **2a**.



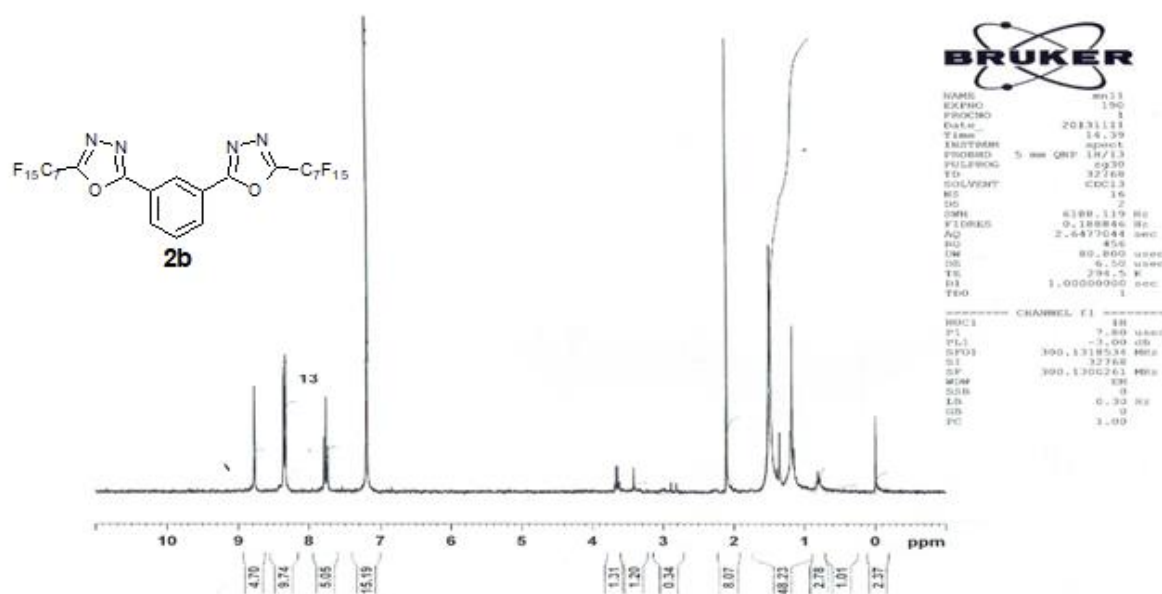

<sup>1</sup>H NMR spectrum of compound **2b**.

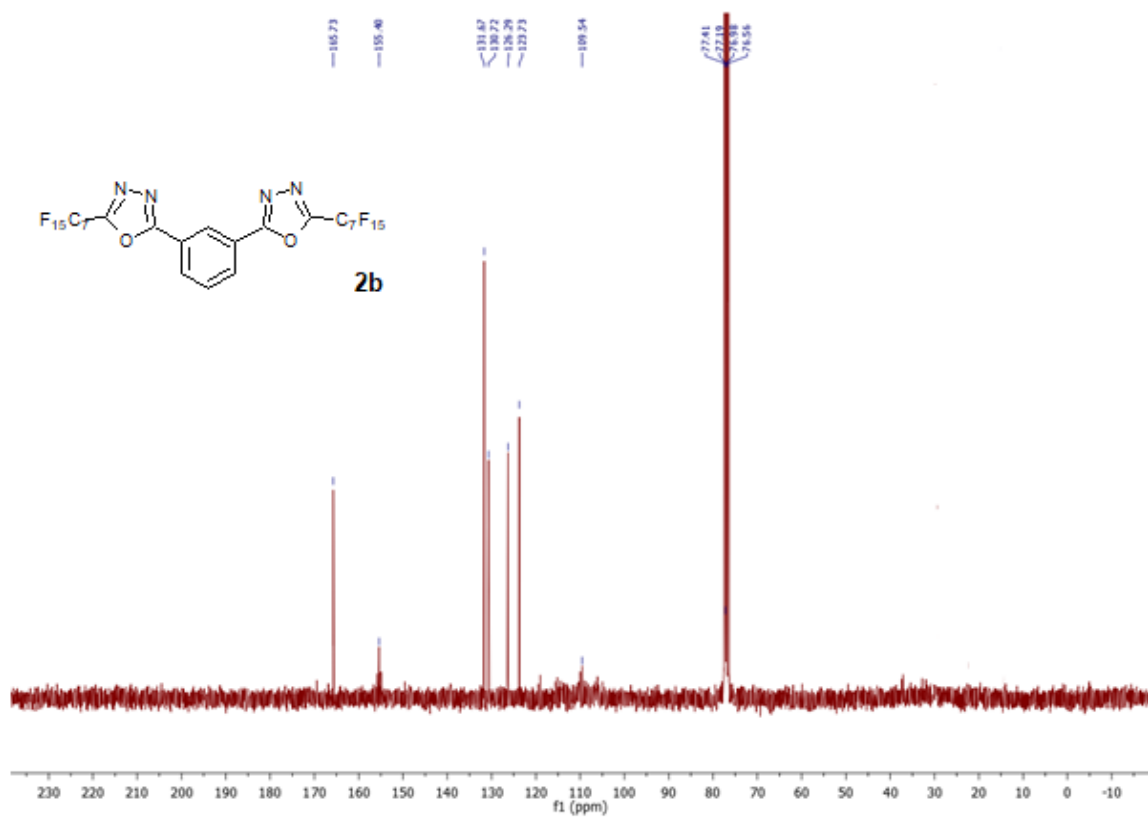

<sup>13</sup>C NMR spectrum of compound **2b**.

mn11.19/f36708/estt-mabr/ox2/cdcl3  
a\_fluor CDCl3 {C:\Spectra\ kt 19

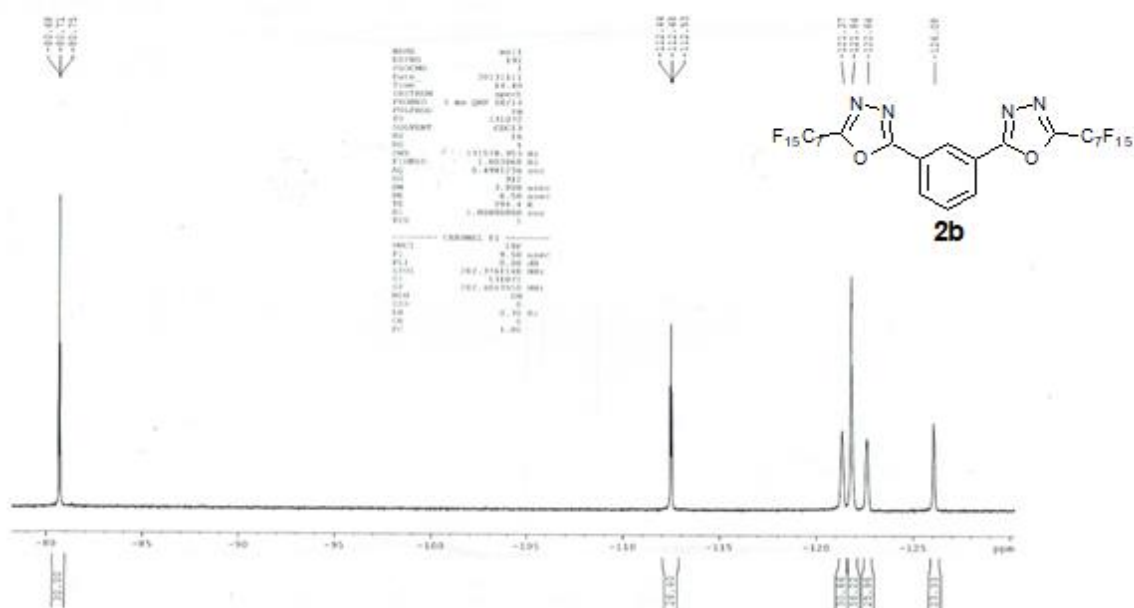

$^{19}\text{F}$  NMR spectrum of compound **2b**.

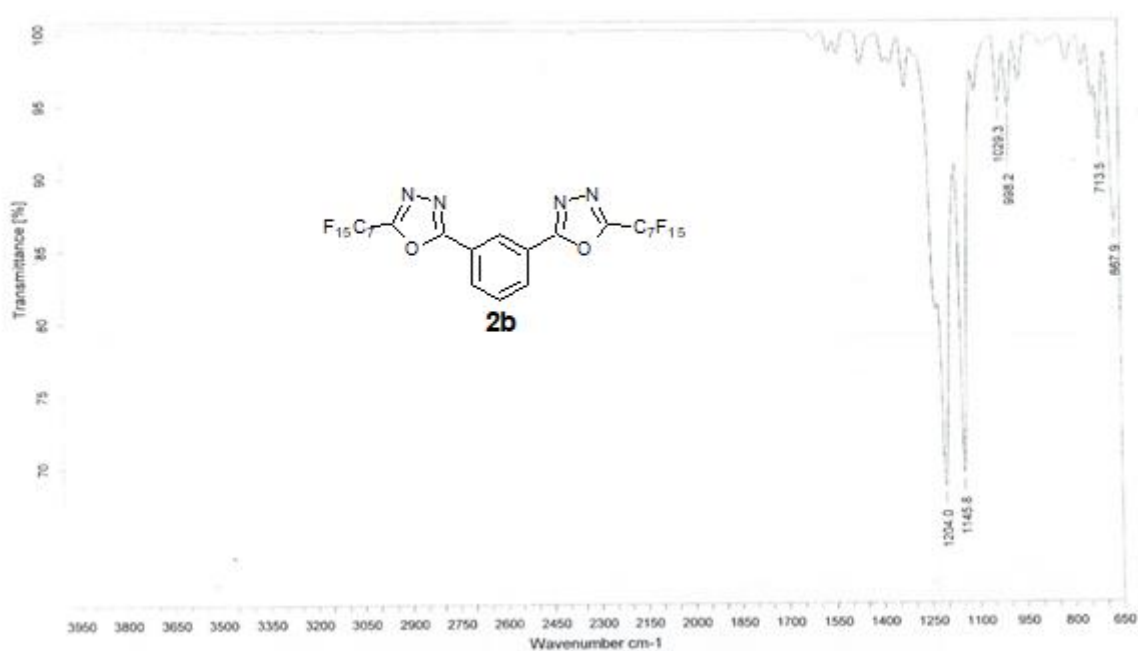

IR spectrum of compound **2b**.

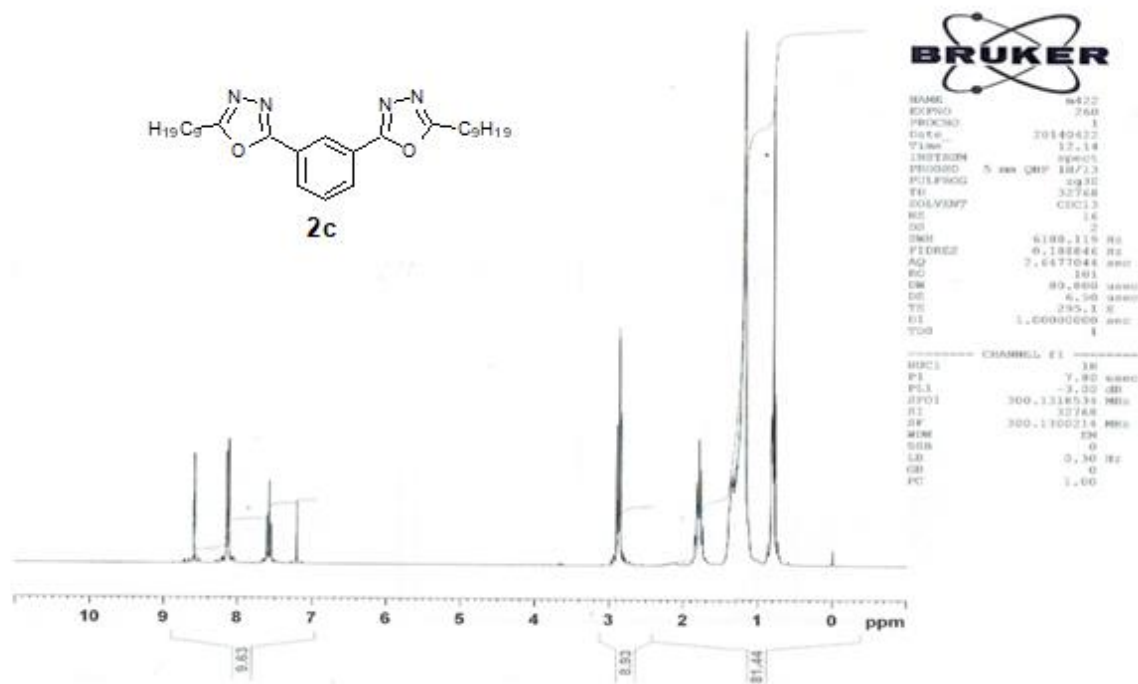

<sup>1</sup>H NMR spectrum of compound **2c**.

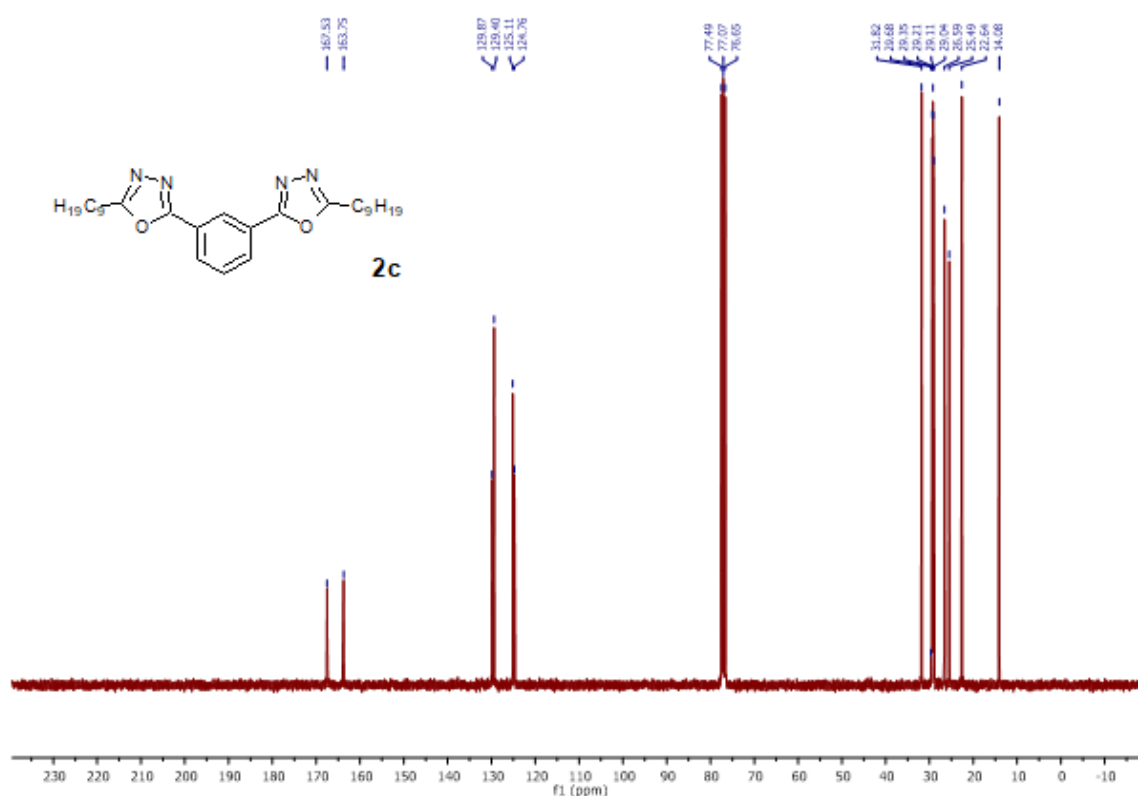

<sup>13</sup>C NMR spectrum of compound **2c**.

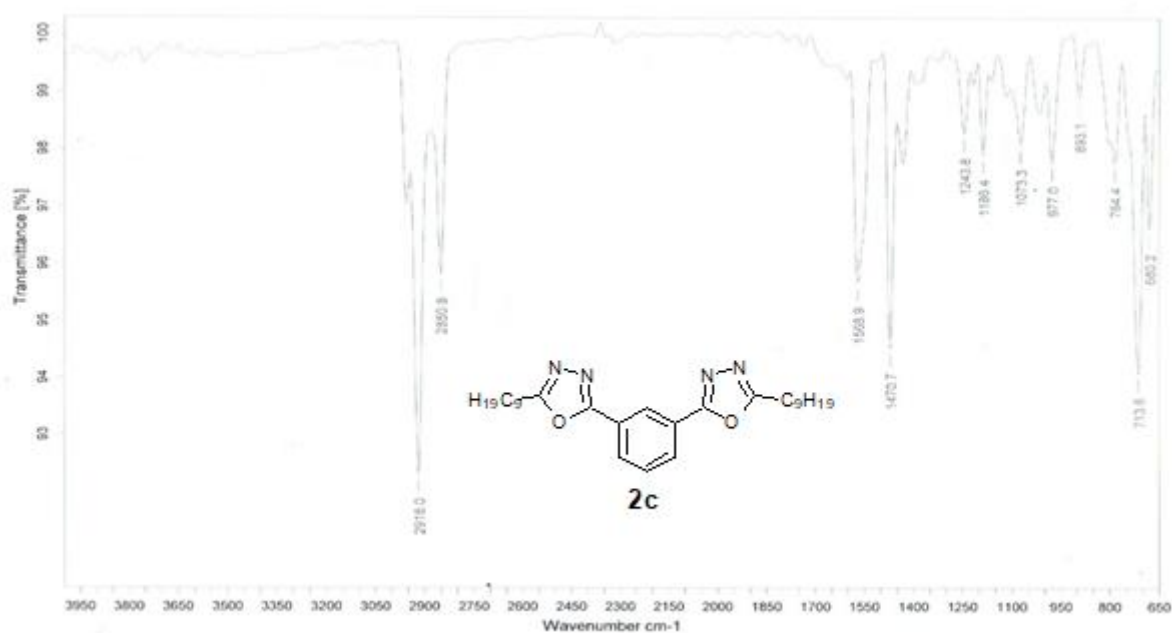

IR spectrum of compound **2c**.

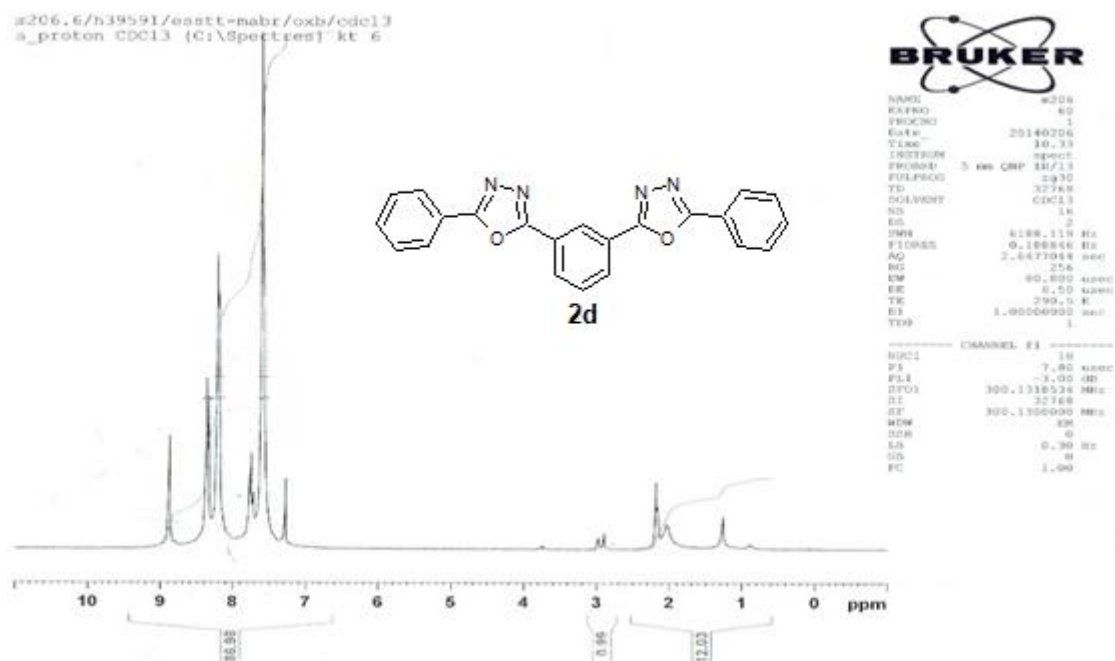

<sup>1</sup>H NMR spectrum of compound **2d**.

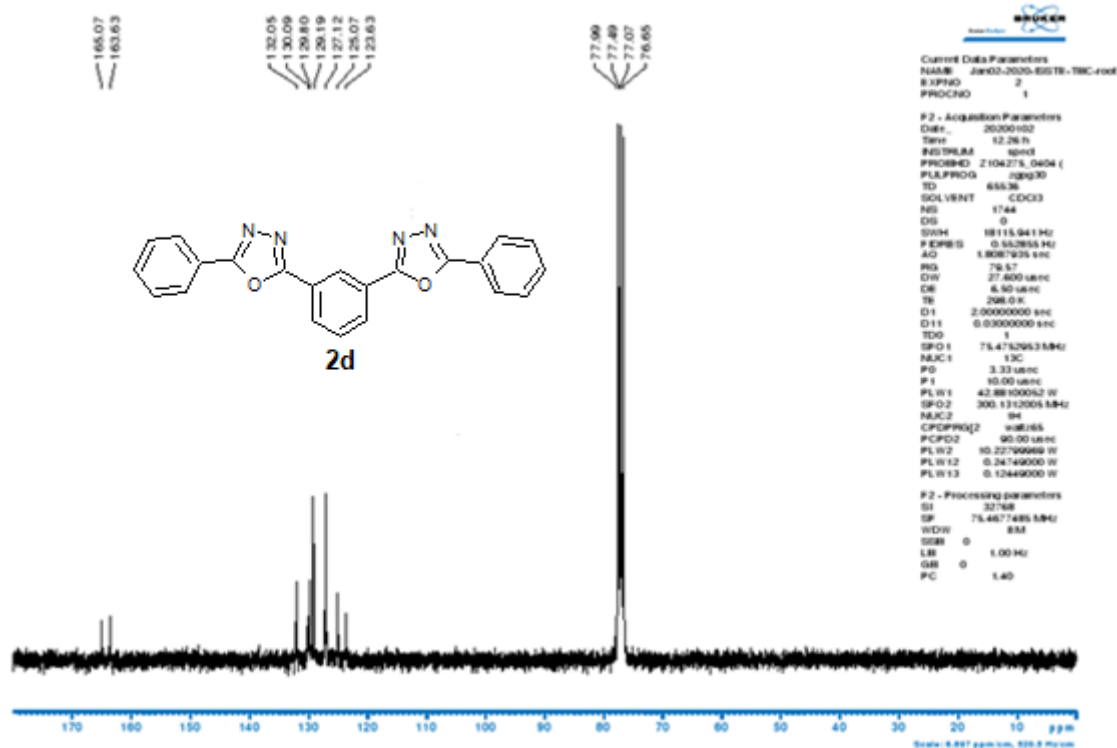

<sup>13</sup>C NMR spectrum of compound **2d**.

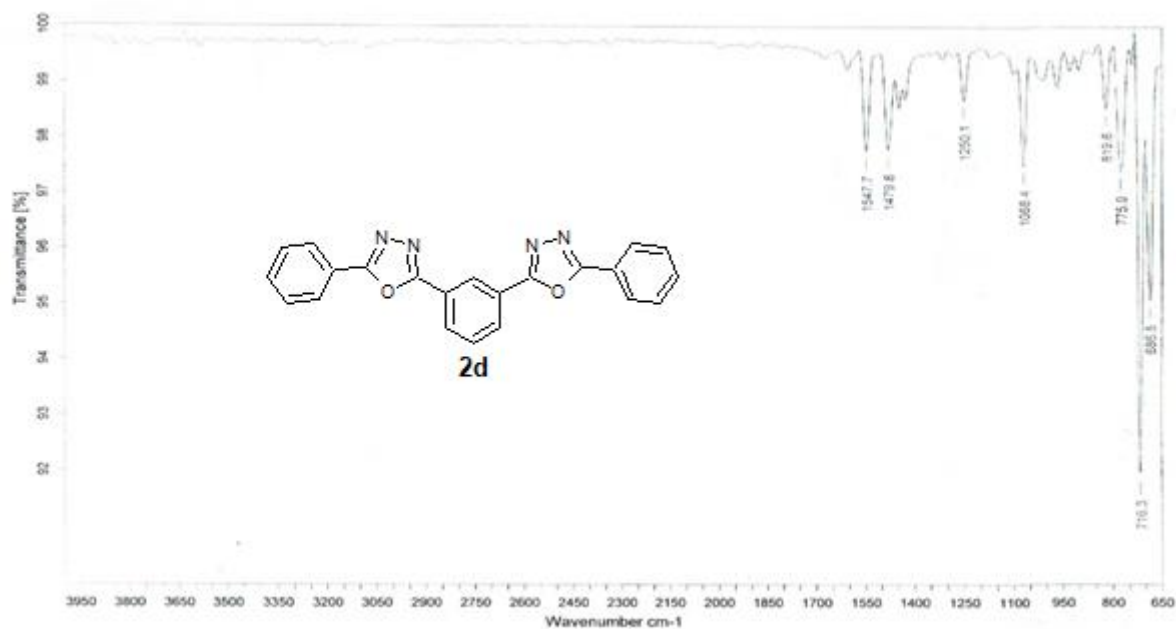

IR spectrum of compound **2d**.

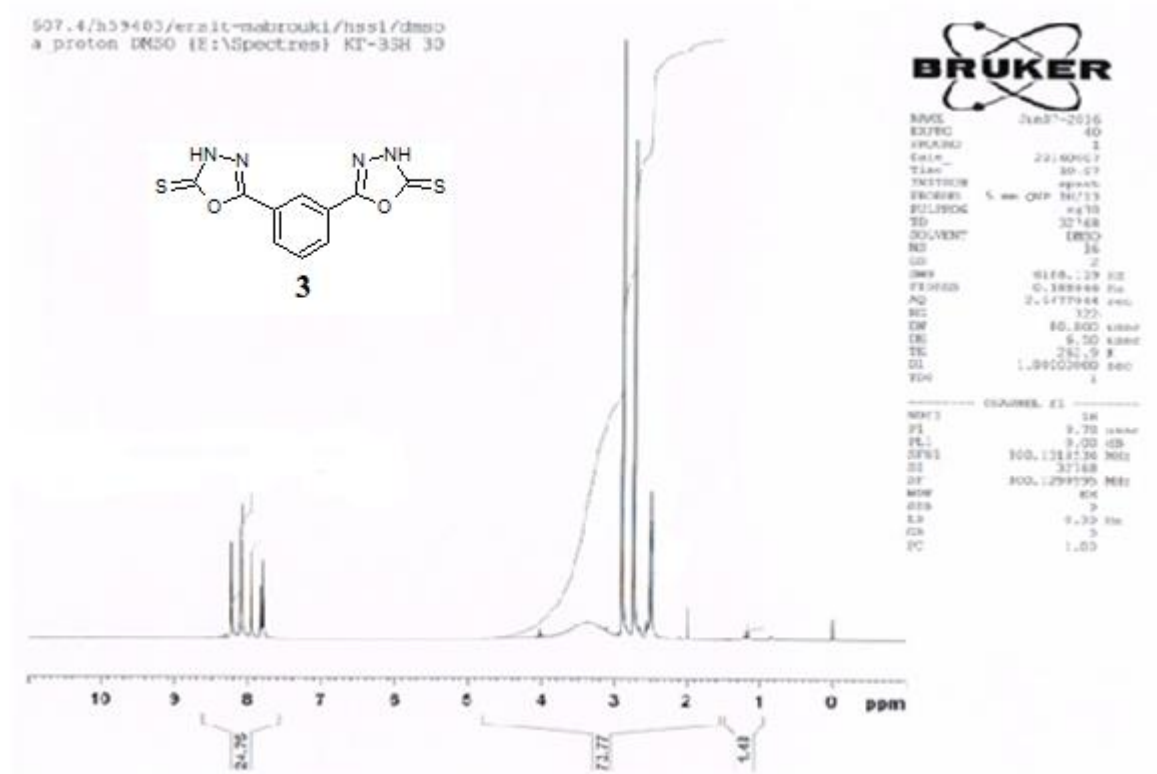

<sup>1</sup>H NMR spectrum of compound 3.

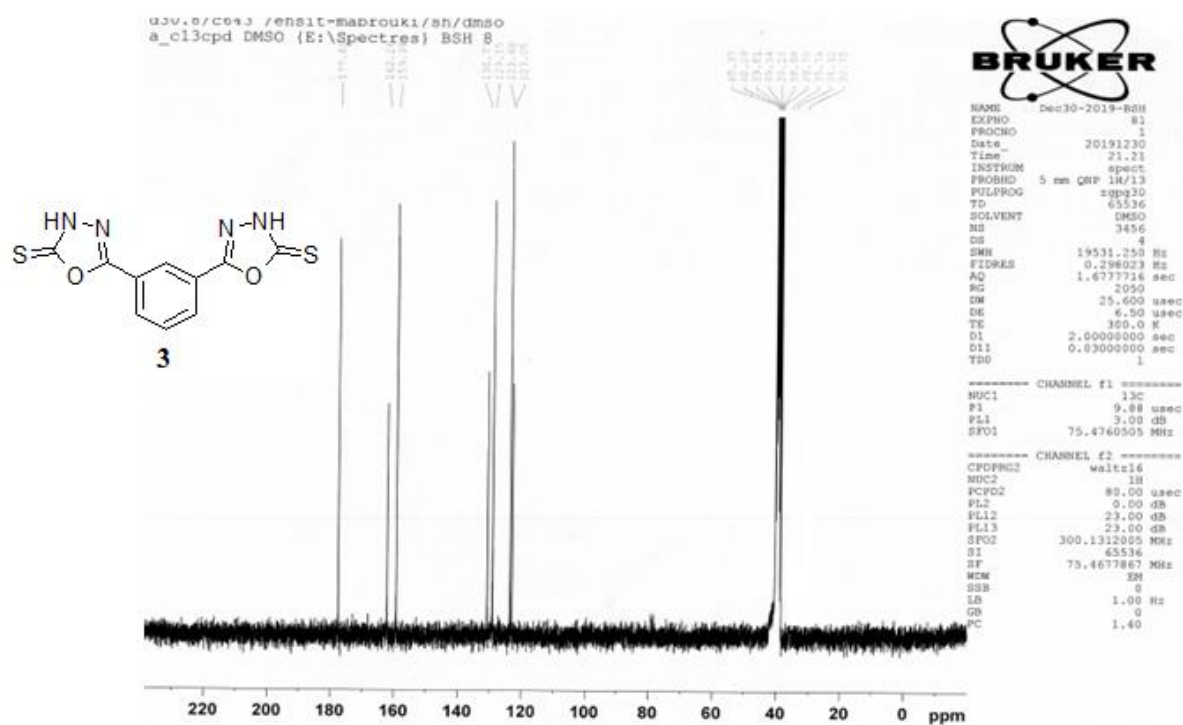

<sup>13</sup>C NMR spectrum of compound 3.

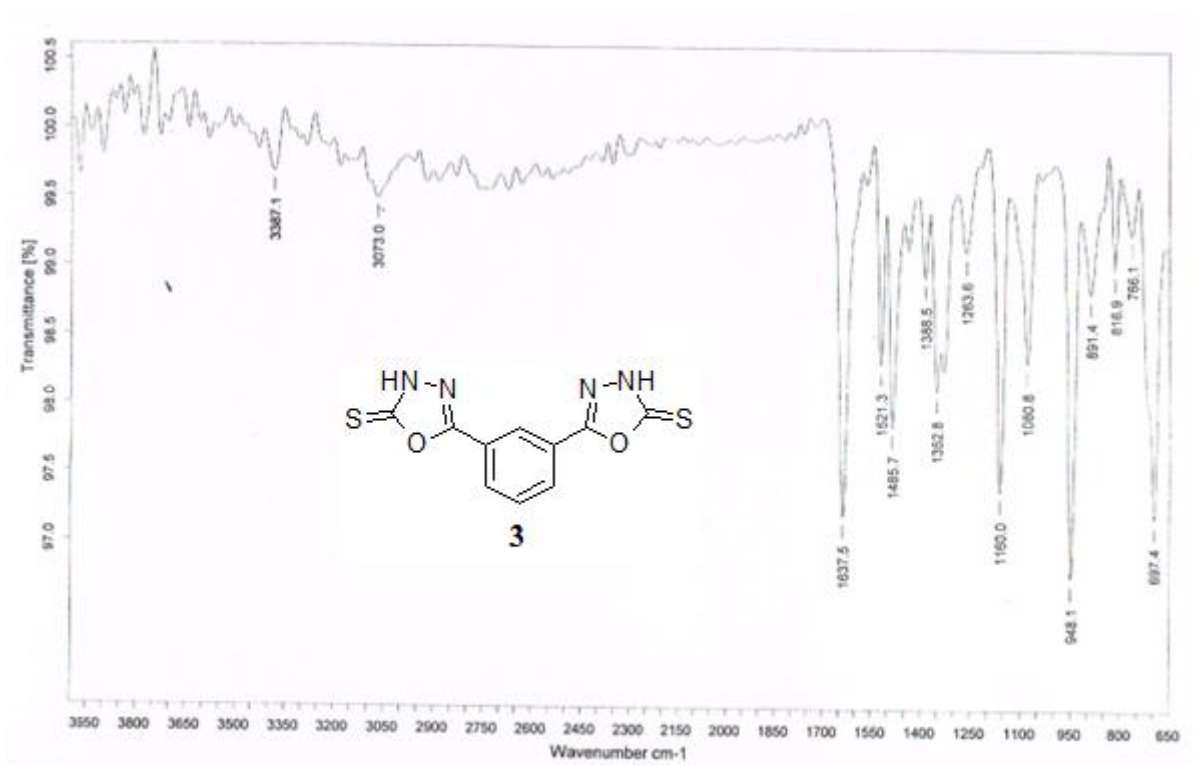

IR spectrum of compound **3**.

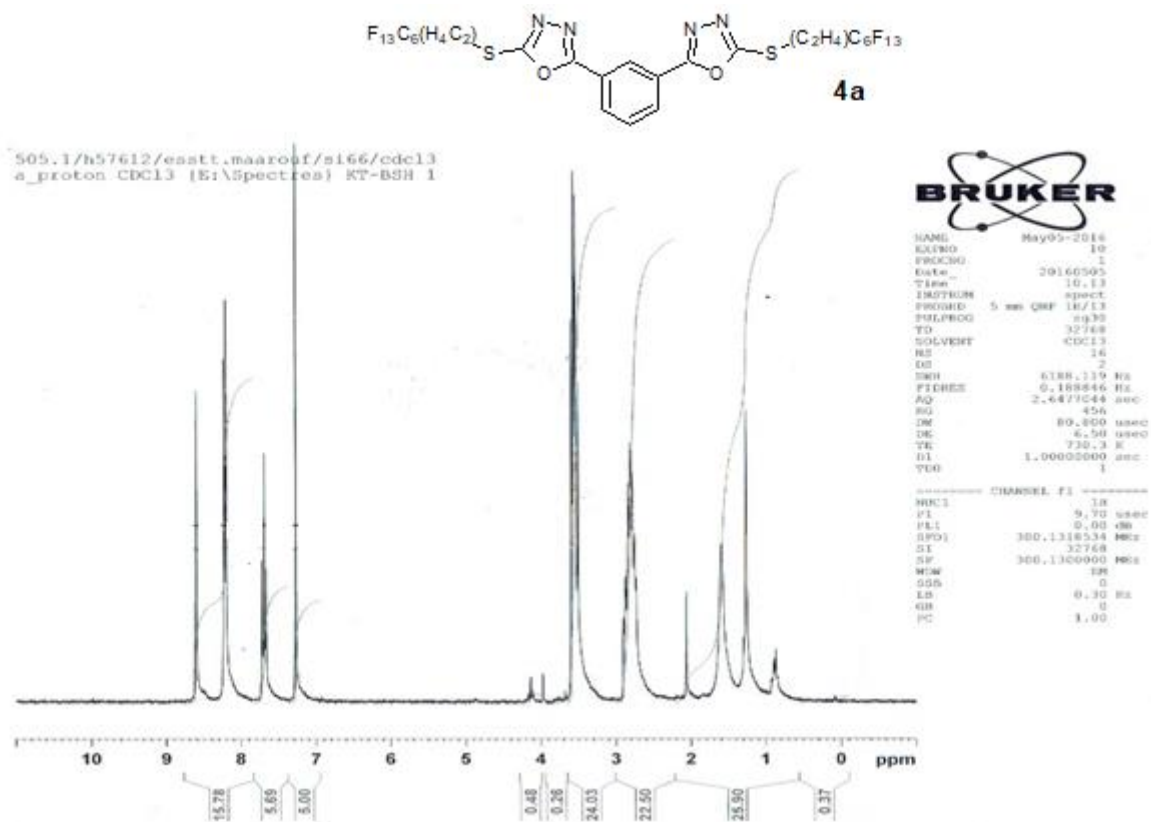

<sup>1</sup>H NMR spectrum of compound **4a**.

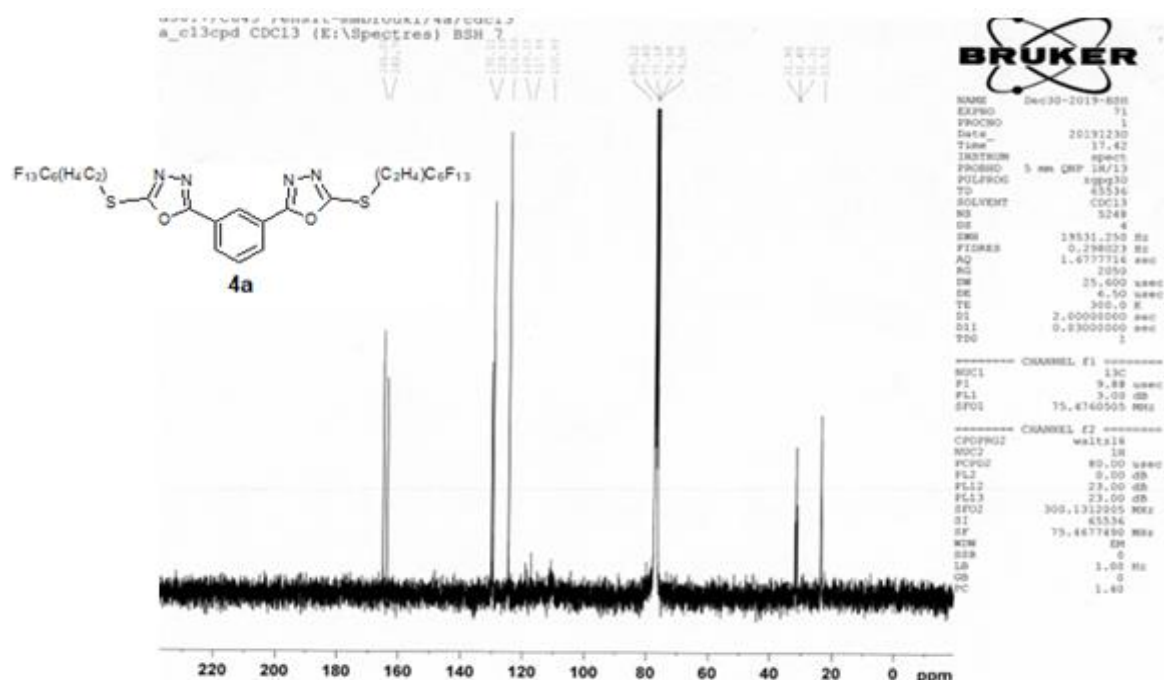

<sup>13</sup>C NMR spectrum of compound **4a**.

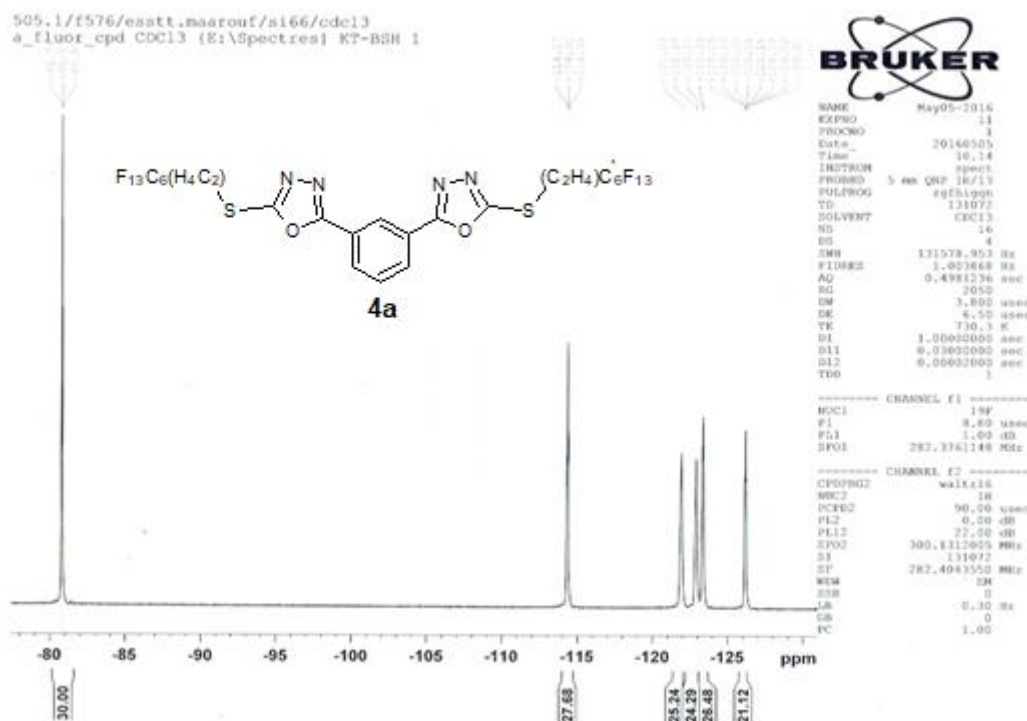

<sup>19</sup>F NMR spectrum of compound **4a**.



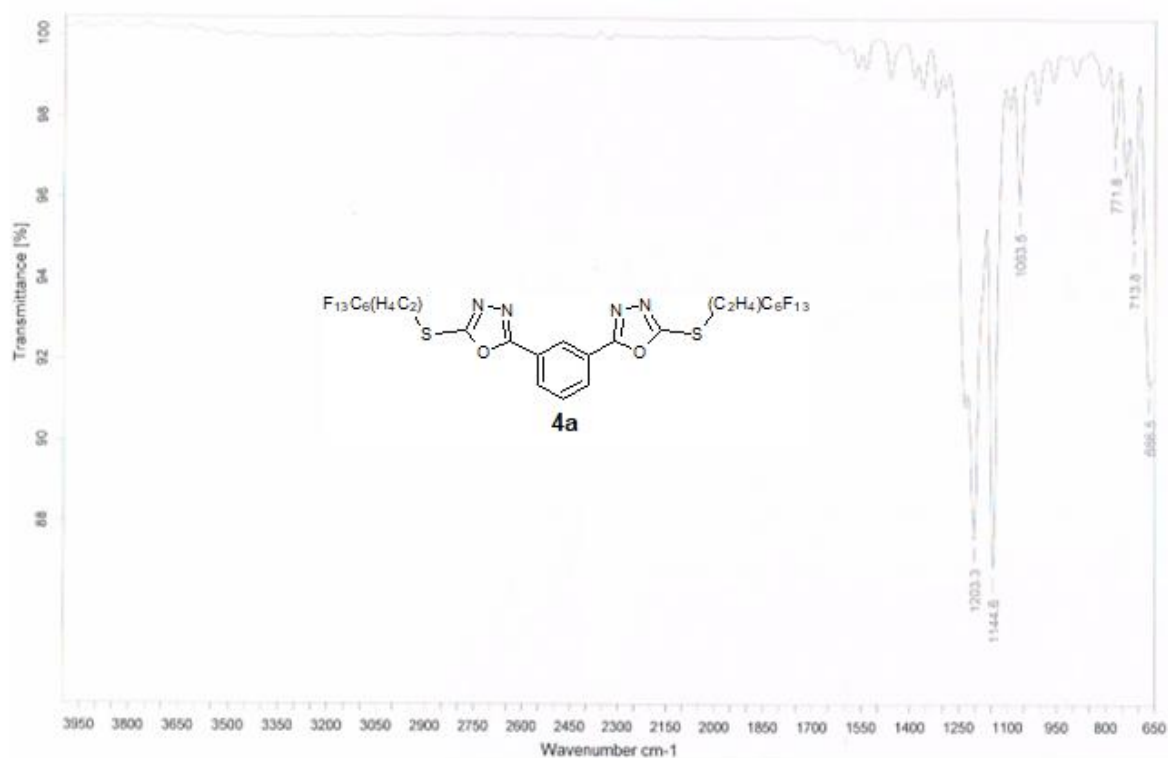

IR spectrum of compound **4a**.

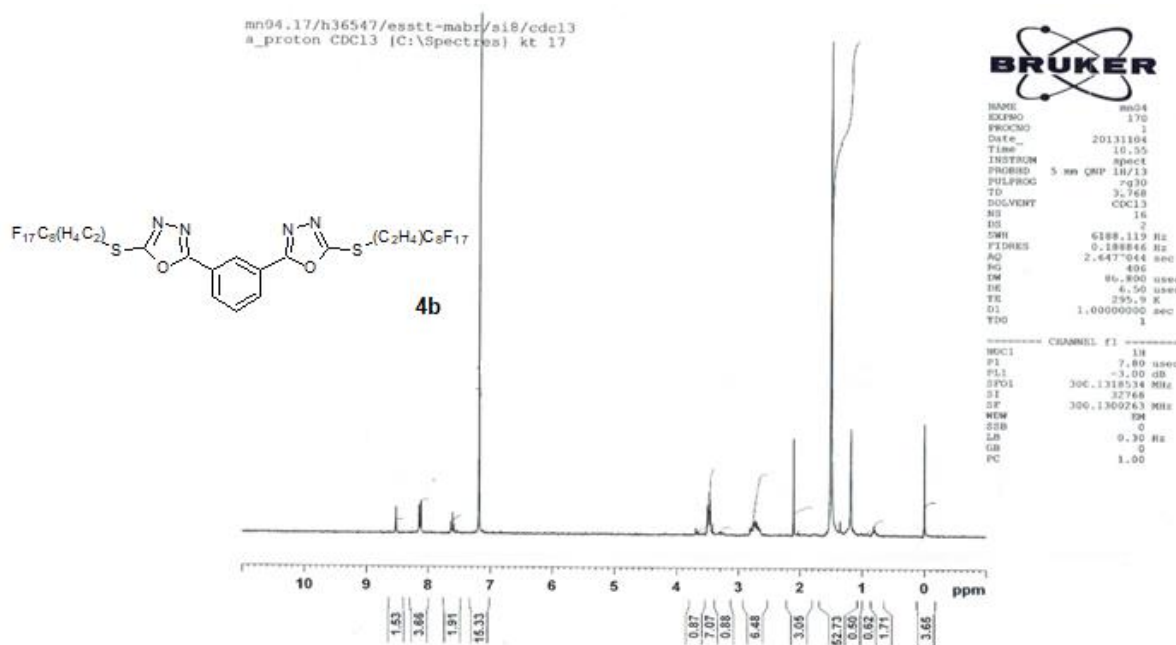

<sup>1</sup>H NMR spectrum of compound **4b**.

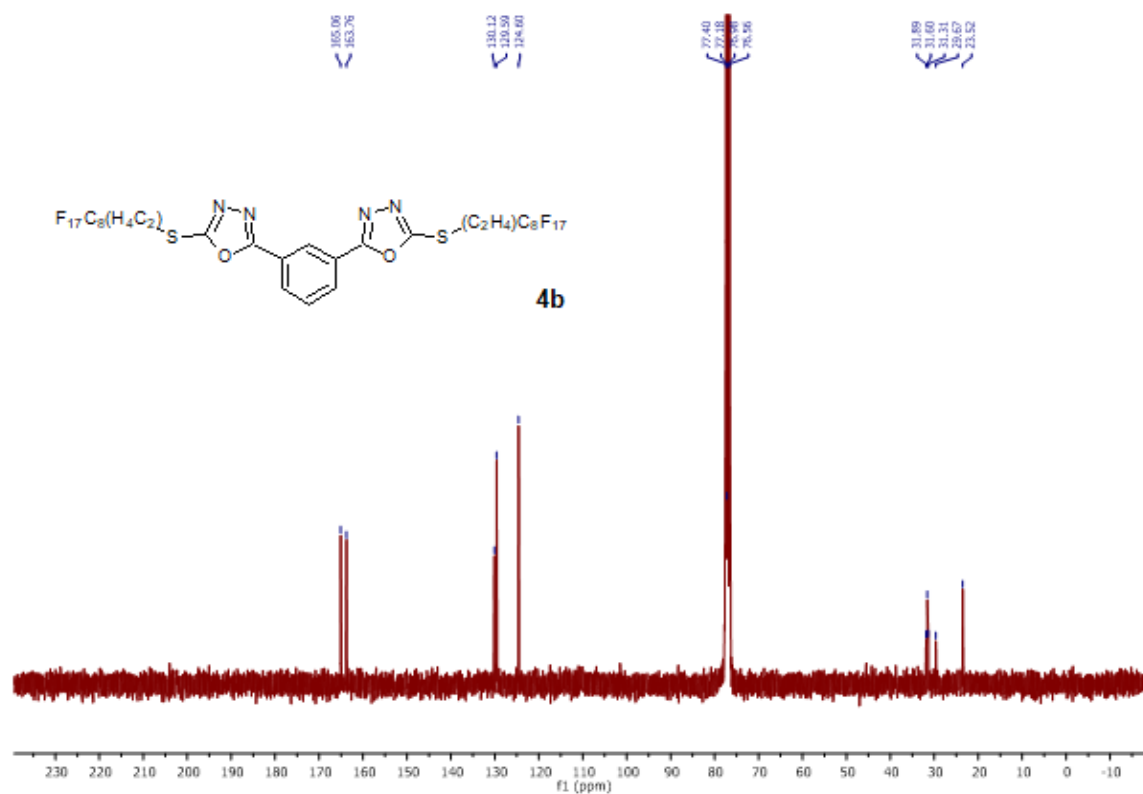

$^{13}\text{C}$  NMR spectrum of compound **4b**.

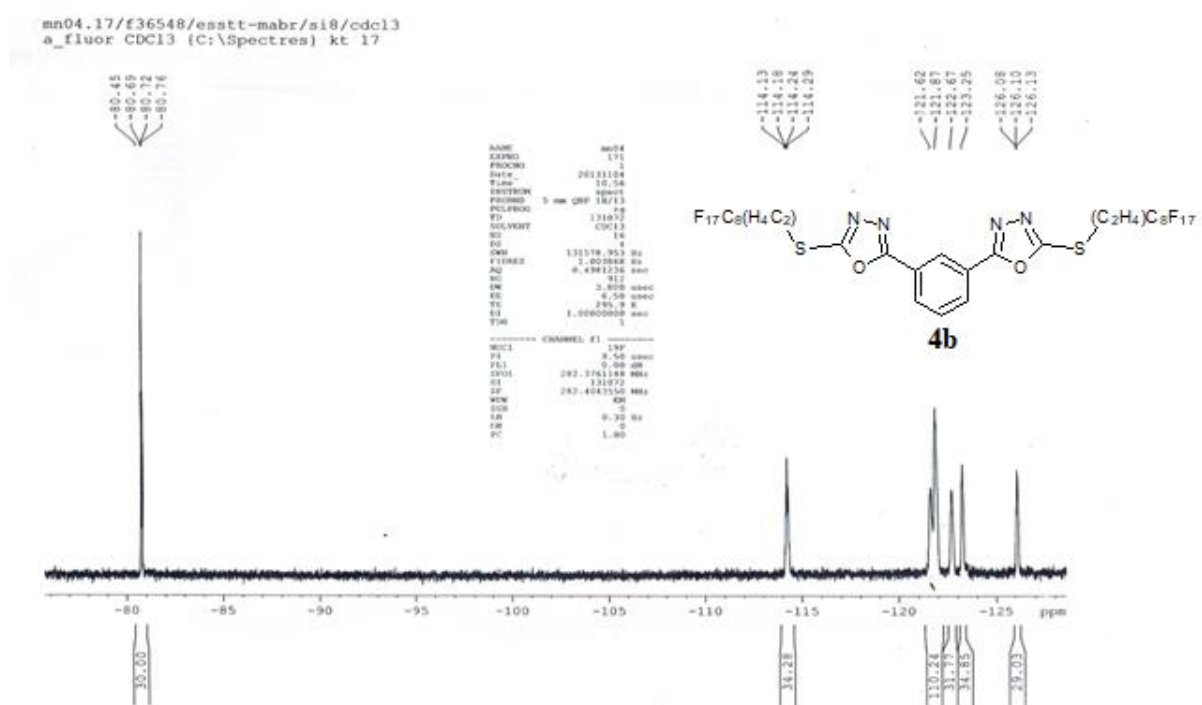

<sup>19</sup>F NMR spectrum of compound **4b**.

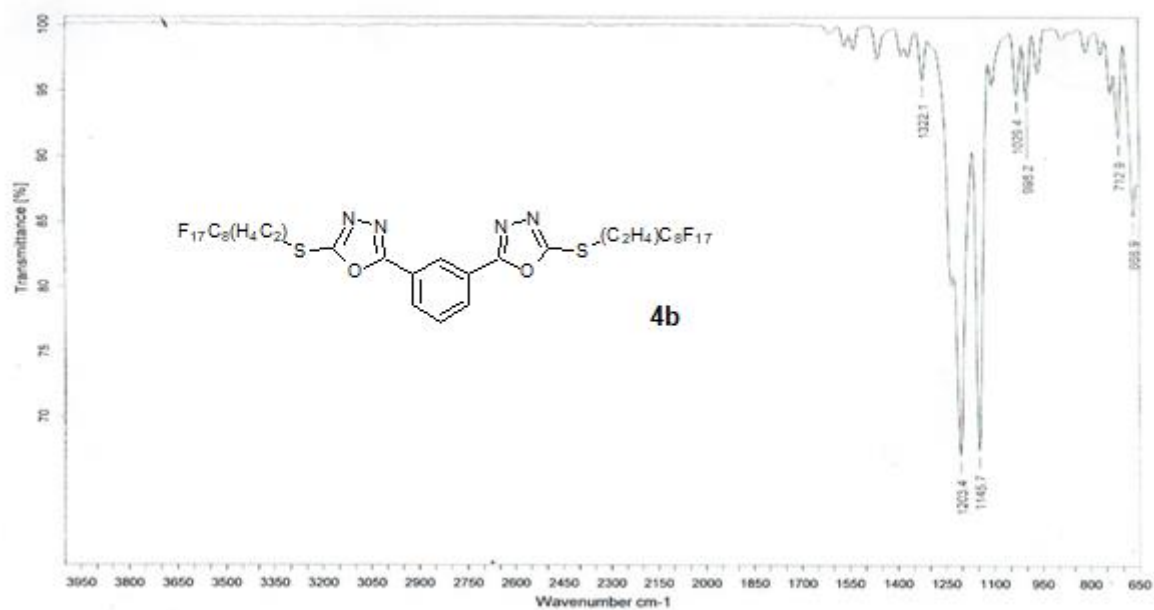

IR spectrum of compound **4b**.

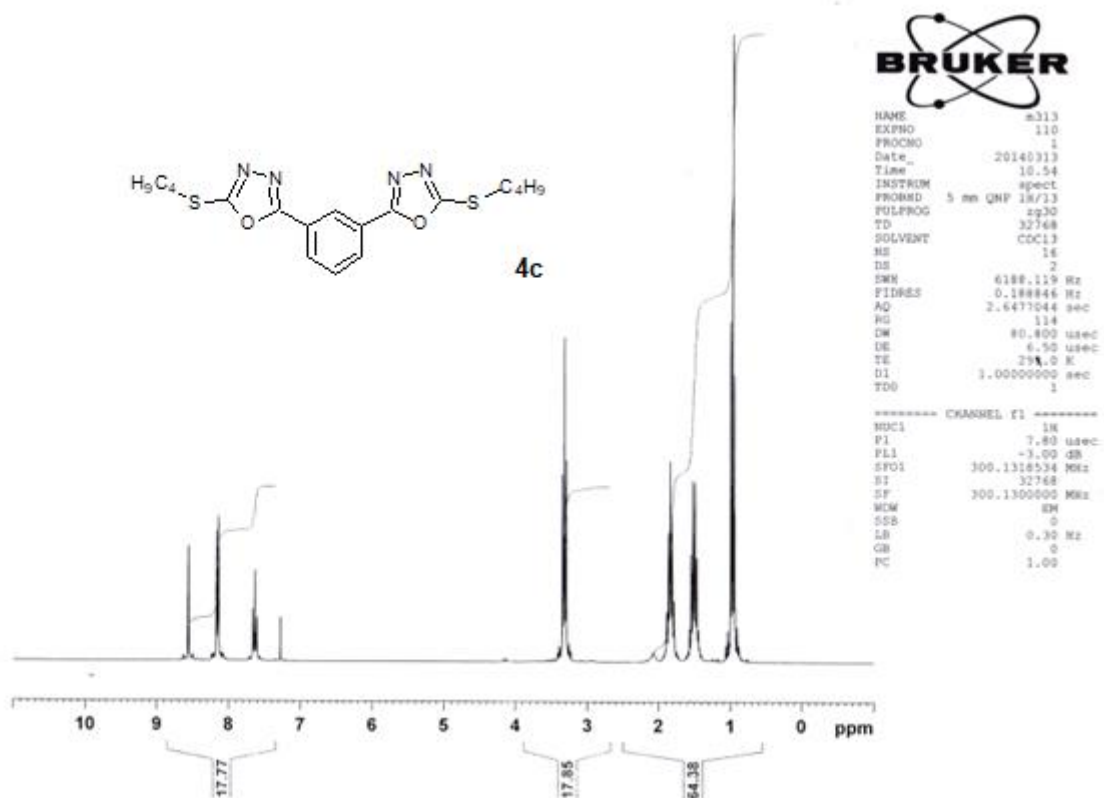

<sup>1</sup>H NMR spectrum of compound **4c**.

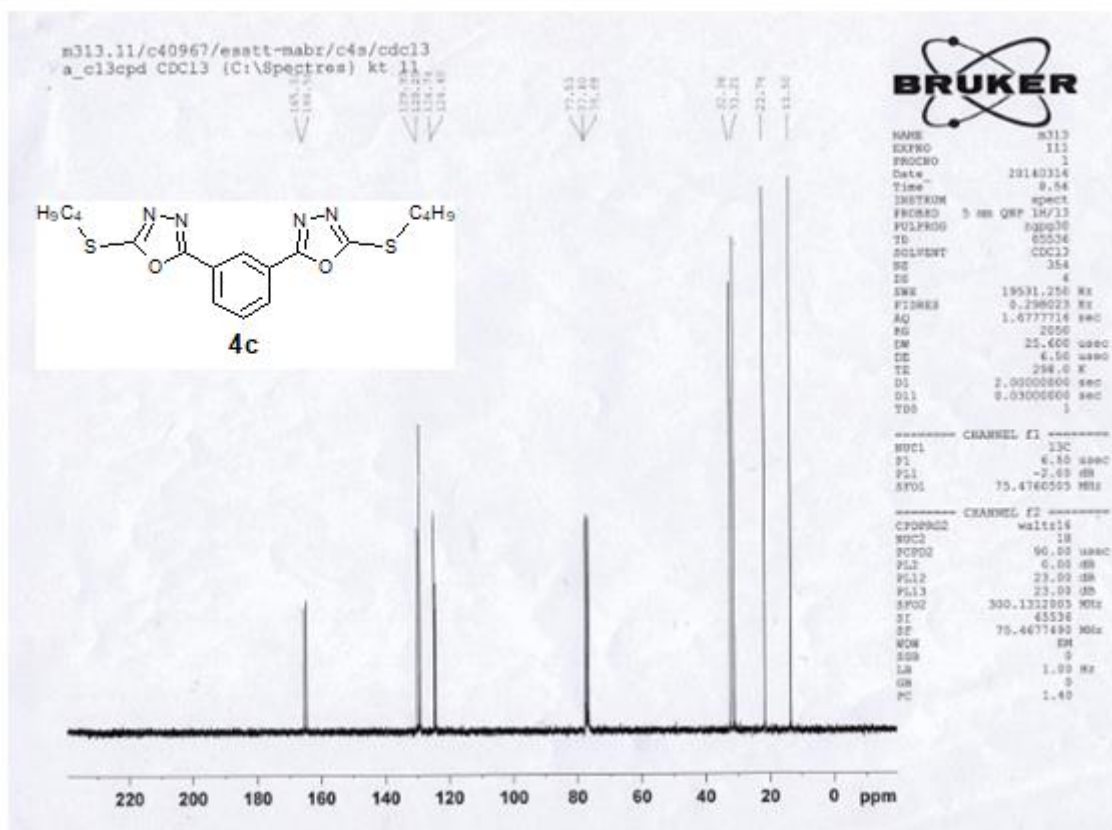

$^{13}\text{C}$  NMR spectrum of compound **4c**.

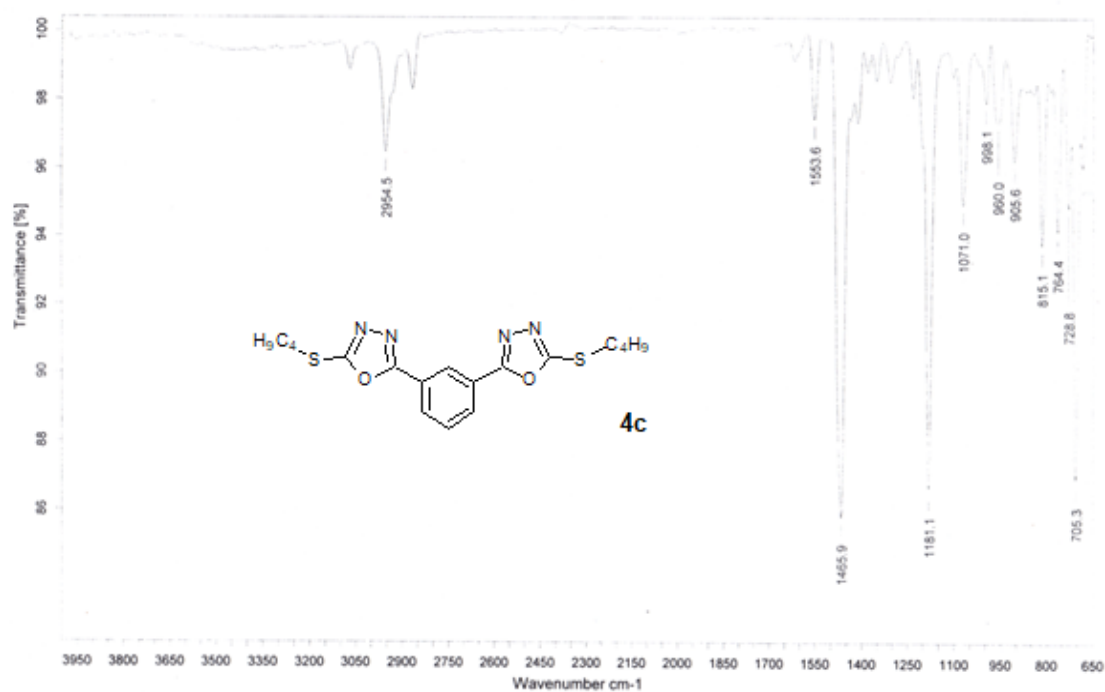

IR spectrum of compound **4c**.

mo31.31/h36429/esstt-mabr/sbr/cdcl3  
a\_proton CDCl3 (C:\Spectres) kt 31

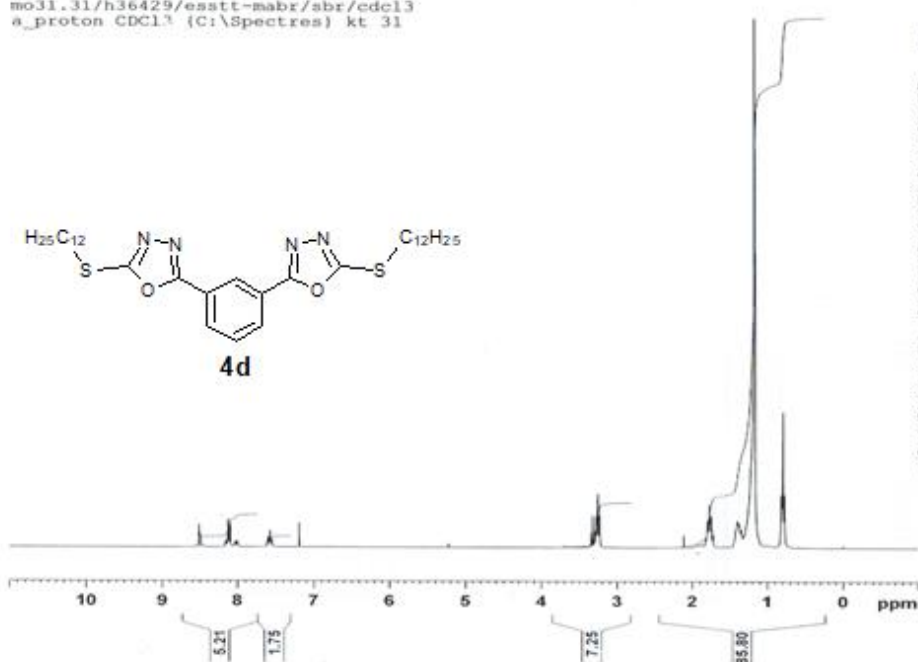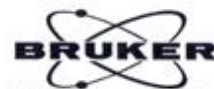

NAME mo31  
EXPNO 310  
PROCNO 1  
Date\_ 20131031  
Time 12.09  
INSTRUM spect  
PROBHD 5 mm QNP 1H/13  
PULPROG zg30  
TD 32768  
SOLVENT CDCl3  
NS 16  
DS 2  
SWH 6188.119 Hz  
FIDRES 0.188846 Hz  
AQ 2.5477044 sec  
RG 101  
DW 80.800 usec  
DE 6.50 usec  
TE 297.7 K  
D1 1.00000000 sec  
TDO 1

===== CHANNEL f1 =====  
NUC1 1H  
P1 7.80 usec  
PL1 -3.00 dB  
SFO1 300.1318534 MHz  
SE 32768  
SF 300.1300250 MHz  
WDW EM  
SSB 0  
LB 0.30 Hz  
GB 0  
PC 1.00

<sup>1</sup>H NMR spectrum of compound **4d**.

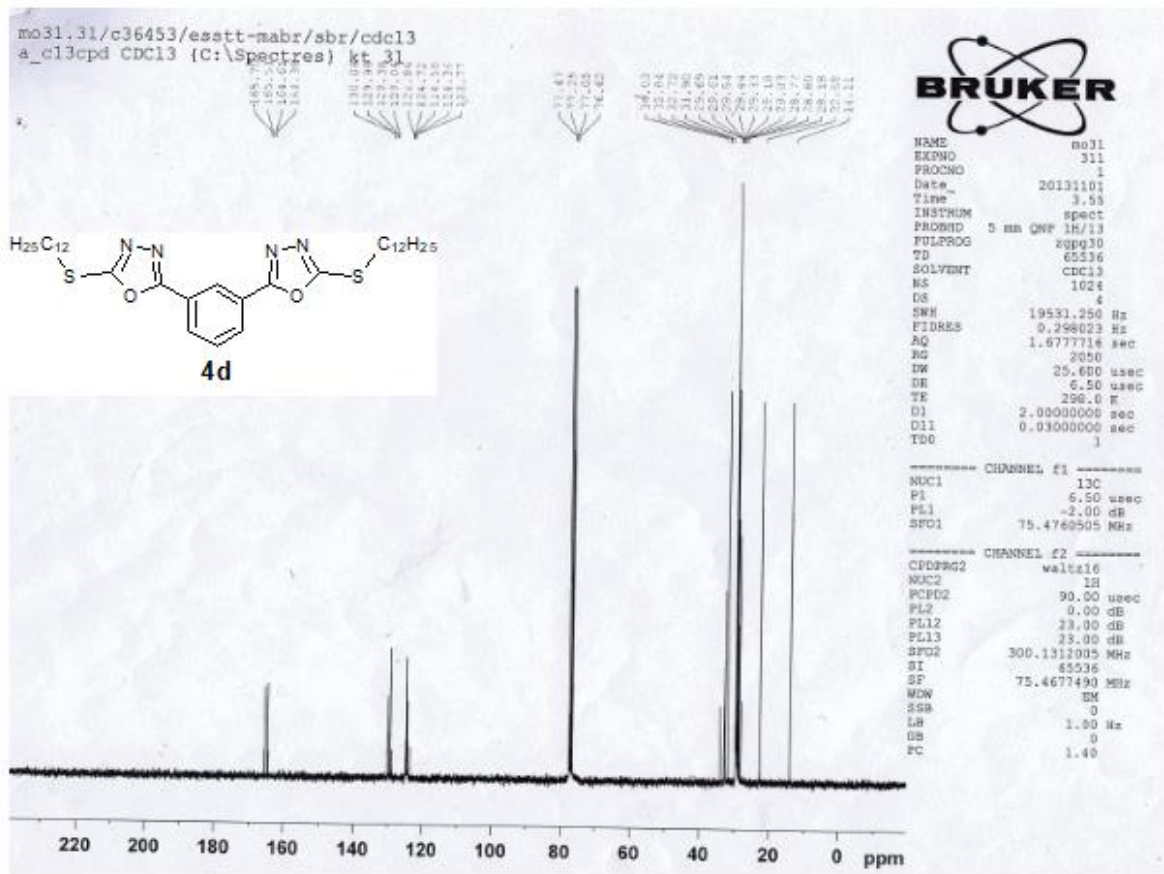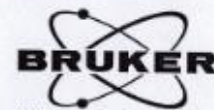

NAME mo31  
EXPNO 311  
PROCNO 1  
Date\_ 20131101  
Time 3.53  
INSTRUM spect  
PROBHD 5 mm QNP 1H/13  
PULPROG zgpg30  
TD 65536  
SOLVENT CDCl3  
NS 1024  
DS 4  
SWH 19531.250 Hz  
FIDRES 0.298023 Hz  
AQ 1.6777714 sec  
RG 2050  
DW 25.600 usec  
DE 6.50 usec  
TE 298.0 K  
D1 2.00000000 sec  
D11 0.03000000 sec  
TDO 1

===== CHANNEL f1 =====  
NUC1 13C  
P1 6.50 usec  
PL1 -2.00 dB  
SFO1 75.4760505 MHz

===== CHANNEL f2 =====  
CPDPRG2 waltz16  
NUC2 1H  
PCPD2 90.00 usec  
PL2 0.00 dB  
PL12 23.00 dB  
PL13 23.00 dB  
SFO2 300.1312005 MHz  
ST 65536  
SF 75.4677490 MHz  
WDW EM  
SSB 0  
LB 1.00 Hz  
GB 0  
PC 1.40

<sup>13</sup>C NMR spectrum of compound **4d**.

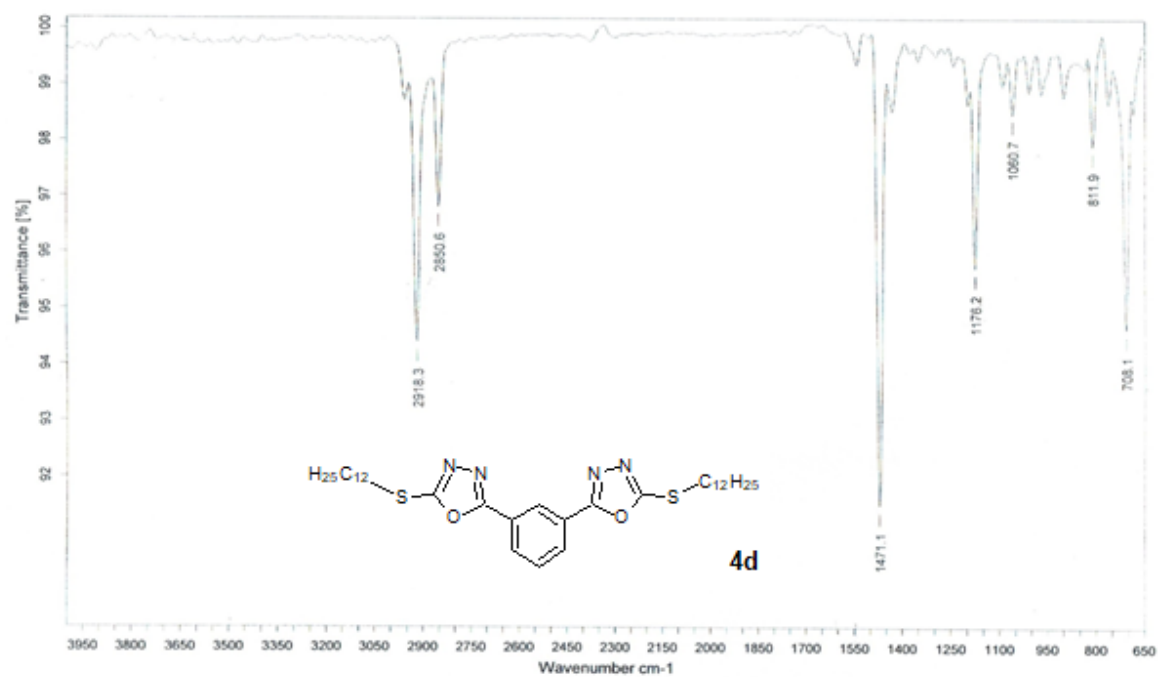

IR spectrum of compound **4d**.

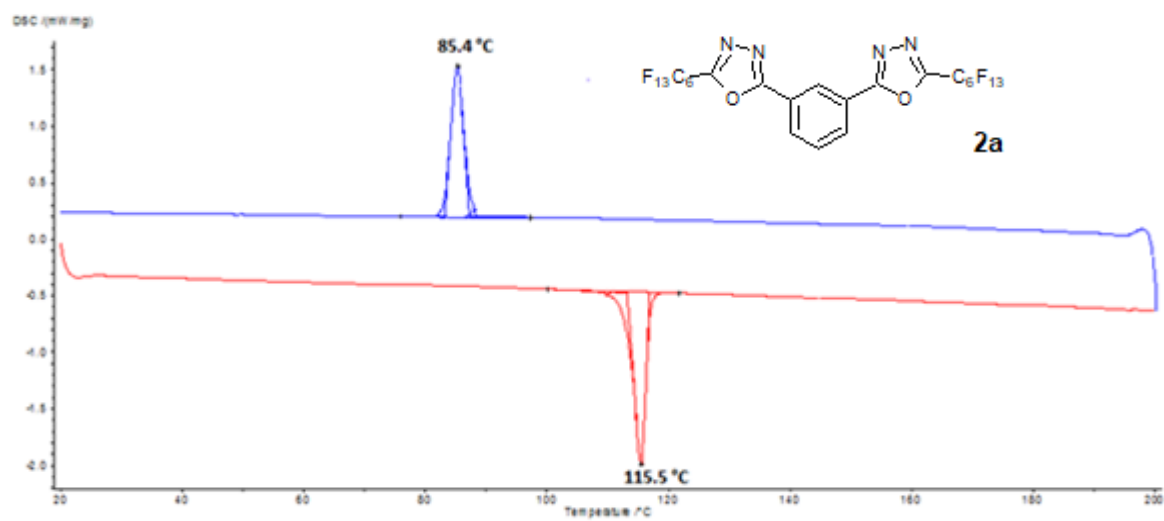

DSC thermogram of compound **2a** recorded at 5 °C/mn at heating (red) and cooling (blue) cycles.

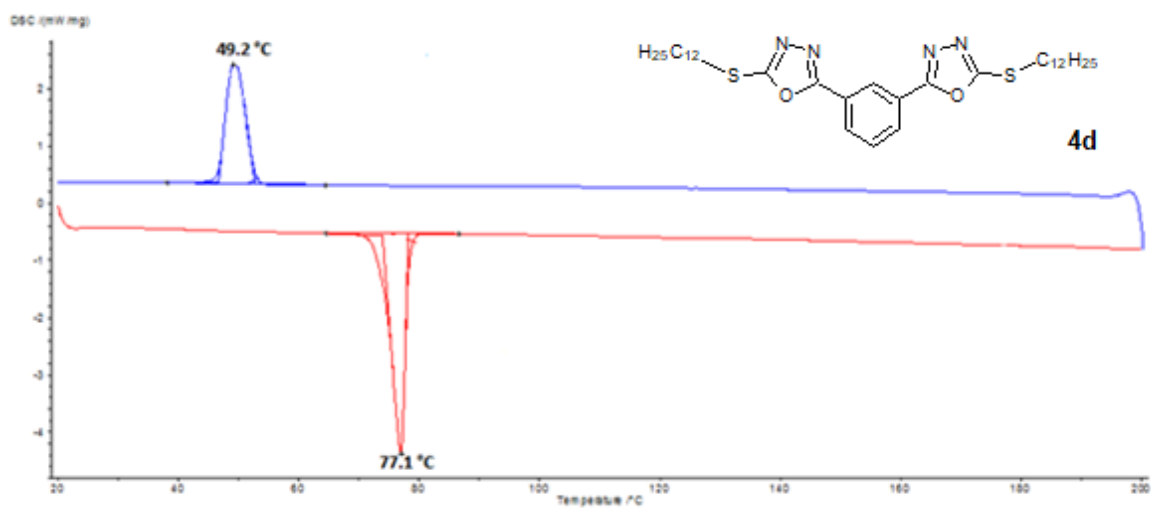

DSC thermogram of compound **4d** recorded at 5 °C/mn at heating (red) and cooling (blue) cycles.
